# Supplementary material for: Agreement between ranking metrics in network meta-analysis: an empirical study
Source: PubMed Central journal article supplement (PMC7440831; doi:10.1136/bmjopen-2020-037744), 2020-08-20
Supplement: bmjopen-2020-037744.draft_revisions.pdf [file bmjopen-2020-037744.draft_revisions.pdf]

# BMJ Open

BMJ Open is committed to open peer review. As part of this commitment we make the peer review history of every article we publish publicly available.

When an article is published we post the peer reviewers' comments and the authors' responses online. We also post the versions of the paper that were used during peer review. These are the versions that the peer review comments apply to.

The versions of the paper that follow are the versions that were submitted during the peer review process. They are not the versions of record or the final published versions. They should not be cited or distributed as the published version of this manuscript.

BMJ Open is an open access journal and the full, final, typeset and author-corrected version of record of the manuscript is available on our site with no access controls, subscription charges or pay-per-view fees (<http://bmjopen.bmj.com>).

If you have any questions on BMJ Open's open peer review process please email [info.bmjopen@bmj.com](mailto:info.bmjopen@bmj.com)

# BMJ Open

## Agreement between ranking metrics in network meta-analysis: an empirical study

|                               |                                                                                                                                                                                                                                                                                                                                                                                                                                                      |
|-------------------------------|------------------------------------------------------------------------------------------------------------------------------------------------------------------------------------------------------------------------------------------------------------------------------------------------------------------------------------------------------------------------------------------------------------------------------------------------------|
| Journal:                      | <i>BMJ Open</i>                                                                                                                                                                                                                                                                                                                                                                                                                                      |
| Manuscript ID                 | bmjopen-2020-037744                                                                                                                                                                                                                                                                                                                                                                                                                                  |
| Article Type:                 | Original research                                                                                                                                                                                                                                                                                                                                                                                                                                    |
| Date Submitted by the Author: | 14-Feb-2020                                                                                                                                                                                                                                                                                                                                                                                                                                          |
| Complete List of Authors:     | Chiocchia, Virginia; University of Bern Institute of Social and Preventive Medicine<br>Nikolakopoulou, Adriani; University of Bern Institute of Social and Preventive Medicine<br>Papakonstantinou, Theodoros; University of Bern Institute of Social and Preventive Medicine<br>Egger, Matthias; University of Bern Institute of Social and Preventive Medicine<br>Salanti, Georgia; University of Bern Institute of Social and Preventive Medicine |
| Keywords:                     | STATISTICS & RESEARCH METHODS, EPIDEMIOLOGY, PUBLIC HEALTH                                                                                                                                                                                                                                                                                                                                                                                           |
|                               |                                                                                                                                                                                                                                                                                                                                                                                                                                                      |

SCHOLARONE™  
Manuscripts

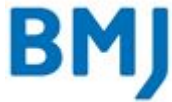

I, the Submitting Author has the right to grant and does grant on behalf of all authors of the Work (as defined in the below author licence), an exclusive licence and/or a non-exclusive licence for contributions from authors who are: i) UK Crown employees; ii) where BMJ has agreed a CC-BY licence shall apply, and/or iii) in accordance with the terms applicable for US Federal Government officers or employees acting as part of their official duties; on a worldwide, perpetual, irrevocable, royalty-free basis to BMJ Publishing Group Ltd ("BMJ") its licensees and where the relevant Journal is co-owned by BMJ to the co-owners of the Journal, to publish the Work in this journal and any other BMJ products and to exploit all rights, as set out in our [licence](#).

The Submitting Author accepts and understands that any supply made under these terms is made by BMJ to the Submitting Author unless you are acting as an employee on behalf of your employer or a postgraduate student of an affiliated institution which is paying any applicable article publishing charge ("APC") for Open Access articles. Where the Submitting Author wishes to make the Work available on an Open Access basis (and intends to pay the relevant APC), the terms of reuse of such Open Access shall be governed by a Creative Commons licence – details of these licences and which [Creative Commons](#) licence will apply to this Work are set out in our licence referred to above.

Other than as permitted in any relevant BMJ Author's Self Archiving Policies, I confirm this Work has not been accepted for publication elsewhere, is not being considered for publication elsewhere and does not duplicate material already published. I confirm all authors consent to publication of this Work and authorise the granting of this licence.

# Agreement between ranking metrics in network meta-analysis: an empirical study

Virginia Chiocchia<sup>1</sup>, Adriani Nikolakopoulou<sup>1</sup>, Theodoros Papakonstantinou<sup>1</sup>, Matthias Egger<sup>1</sup>,  
Georgia Salanti<sup>1</sup>

<sup>1</sup> Institute of Social and Preventive Medicine (ISPM), University of Bern, Bern, Switzerland

Correspondence to:

Virginia Chiocchia, Institute of Social and Preventive Medicine, University of Bern,  
Mittelstrasse 43, CH-3012 Bern, Switzerland.

Email: [virginia.chiocchia@ispm.unibe.ch](mailto:virginia.chiocchia@ispm.unibe.ch)

Abstract 294 words, main text 3004 words, 3 tables, 3 figures, 27 references

Keywords: treatment hierarchy, multiple treatments, evidence synthesis, SUCRA, rank probabilities

## ABSTRACT

### Objective

To empirically explore the level of agreement of the treatment hierarchies from different ranking metrics in network meta-analysis (NMA) and to investigate how network characteristics influence the agreement.

### Design

Empirical evaluation from re-analysis of network meta-analyses.

### Data

232 networks of four or more interventions from randomised controlled trials, published between 1999 and 2015.

### Methods

We calculated treatment hierarchies from several ranking metrics: relative treatment effects, probability of producing the best value ( $p_{BV}$ ) and the surface under the cumulative ranking curve (SUCRA). We estimated the level of agreement between the treatment hierarchies using different measures: Kendall's  $\tau$  and Spearman's  $\rho$  correlation; and the Yilmaz  $\tau_{AP}$  and Average Overlap, to give more weight to the top of the rankings. Finally, we assessed how the amount of the information present in a network affects the agreement between treatment hierarchies, using the average variance, the relative range of variance, and the total sample size over the number of interventions of a network.

### Results

Overall, the pairwise agreement was high for all treatment hierarchies obtained by the different ranking metrics. The highest agreement was observed between SUCRA and the relative treatment effect for both correlation and top-weighted measures whose medians

1  
2  
3 were all equal to one. The agreement between rankings decreased for networks with less  
4  
5 precise estimates and the hierarchies obtained from  $p_{BV}$  appeared to be the most sensitive  
6  
7 to large differences in the variance estimates. However, such large differences were rare.  
8  
9

## 10 Conclusions

11  
12 Different ranking metrics address different treatment hierarchy problems, however they  
13  
14 produced similar rankings in the published networks. Researchers reporting NMA results can  
15  
16 use the ranking metric they prefer, unless there are imprecise estimates or large imbalances  
17  
18 in the variance estimates. In this case treatment hierarchies based on both probabilistic and  
19  
20 non-probabilistic ranking metrics should be presented.  
21  
22  
23  
24  
25  
26  
27  
28  
29  
30  
31  
32  
33  
34  
35  
36  
37  
38  
39  
40  
41  
42  
43  
44  
45  
46  
47  
48  
49  
50  
51  
52  
53  
54  
55  
56  
57  
58  
59  
60

## STRENGTH AND LIMITATIONS OF THIS STUDY

- To our knowledge, this is the first empirical study exploring the level of agreement of the treatment hierarchies from different ranking metrics in network meta-analysis (NMA).
- The study also explores how agreement is influenced by network characteristics.
- More than 200 published NMAs were re-analysed and three different ranking metrics calculated using both frequentist and Bayesian approaches.
- Other potential factors not investigated in this study could influence the agreement between hierarchies.

## INTRODUCTION

Network meta-analysis (NMA) is being increasingly used by policy makers and clinicians to answer one of the key questions in medical decision-making: “what treatment works best for the given condition?” [1,2]. The relative treatment effects, estimated in NMA, can be used to produce ranking metrics: statistical quantities measuring the performance of an intervention on the studied outcomes, thus producing a treatment hierarchy from the most preferable to the least preferable option [3,4].

Despite the importance of treatment hierarchies in evidence-based decision making, various methodological issues related to the ranking metrics have been contested [5–7]. This ongoing methodological debate focuses on the uncertainty and bias in a single ranking metric. Hierarchies produced by different ranking metrics are not expected to agree because ranking metrics differ. For example, a *non-probabilistic ranking metric* such as the treatment effect against a common comparator considers only the mean effect (e.g. the point estimate of the odds-ratio) and ignores the uncertainty with which this is estimated. In contrast, the probability that a treatment achieves a specific rank (a *probabilistic ranking metric*) considers the entire estimated distribution of each treatment effect. However, it is important to understand why and how rankings based on different metrics differ.

There are network characteristics that are expected to influence the agreement of treatment hierarchies from different ranking metrics, such as the precision of the included studies and their distribution across treatment comparisons [4,8]. Larger imbalances in precision in the estimation of the treatment effects affects the agreement of the treatment hierarchies from probabilistic ranking metrics, but it is currently unknown whether in practice these imbalances occur and whether they should inform the choice between different ranking



1  
2  
3 metrics. To our knowledge, no empirical studies have explored the level of agreement of  
4  
5 treatment hierarchies obtained from different ranking metrics, or examined the network  
6  
7 characteristics likely to influence the level of agreement. Here, we empirically evaluated the  
8  
9 level of agreement between ranking metrics and examined how the agreement is affected by  
10  
11 network features. The article first describes the methods for the calculation of ranking metrics  
12  
13 and of specific measures to assess the agreement and to explore factors that affects it,  
14  
15 respectively. Then, a network featuring one of the explored factors is shown as an illustrative  
16  
17 example to display differences in treatment hierarchies from different ranking metrics.  
18  
19 Finally, we present the results from the empirical evaluation and discuss their implications for  
20  
21 researchers undertaking network meta-analysis.  
22  
23  
24  
25  
26  
27  
28

## 29 METHODS

### 30 Data

31  
32 We re-analysed networks of randomised controlled trials from a database of articles  
33  
34 published between 1999 and 2015, including at least 4 treatments; details about the search  
35  
36 strategy and inclusion/exclusion criteria can be found in [9,10]. We selected networks  
37  
38 reporting arm-level data for binary or continuous outcomes. The database is accessible in the  
39  
40 *nmadb* R package [11].  
41  
42  
43  
44  
45  
46

### 47 Re-analysis and calculation of ranking metrics

48  
49 All networks were re-analysed using the relative treatment effect that the original publication  
50  
51 used: odds ratio (OR), risk ratio (RR), standardised mean difference (SMD) or mean difference  
52  
53 (MD). We estimated relative effects between treatments using a frequentist random-effects  
54  
55 NMA model using the *netmeta* R package [12]. For the networks reporting ORs and SMDs we  
56  
57 re-analysed them also using Bayesian models using self-programmed NMA routines in JAGS  
58  
59  
60

(<https://github.com/esm-ispm-unibe-ch/NMAJags>). To obtain probabilistic ranking metrics in a frequentist setting, we used parametric bootstrap by producing 1000 datasets from the estimated relative effects and their variance-covariance matrix. By averaging over the number of simulated relative effects we derived the *probability of treatment  $i$  to produce the best value*

$$p_{i,BV} = p_{i,1} = P(\mu_{ij} > 0 \quad \forall j \in \mathbb{T})$$

where  $\mu_{ij}$  is the estimated mean relative effect of treatment  $i$  against treatment  $j$  out of a set  $\mathbb{T}$  of  $T$  competing treatments. We will refer to this as  $p_{BV}$ . This ranking metric indicates how likely a treatment is to produce the largest values for an outcome (or smallest value, if the outcome is harmful). We also calculated the surface under the cumulative ranking curve ( $SUCRA^F$ ) [3]

$$SUCRA_i = \frac{\sum_{r=1}^{T-1} c_{i,r}}{T-1}$$

where  $c_{i,r} = \sum_{v=1}^r p_{i,v}$  are the cumulative probabilities that treatment  $i$  will produce an outcome that is among the  $r$  best values (or that it outperforms  $T - r$  treatments). SUCRA, unlike  $p_{BV}$ , also considers the probability of a treatment to produce unfavourable outcome values. Therefore, the treatment with the largest SUCRA value represents the one that outperforms the competing treatments in the network, meaning that overall it produces preferable outcomes compared to the others. We also obtained SUCRAs within a Bayesian framework ( $SUCRA^B$ ).

To obtain the non-probabilistic ranking metric we fitted an NMA model and estimated related treatment effects. To obtain estimates for all treatments we reparametrize the NMA model so that each treatment is compared to a fictional treatment of average performance [13,14]. The estimated relative effects against a fictional treatment  $F$  of average efficacy  $\hat{\mu}_{iF}$  represent

1  
2  
3 the ranking metric and the corresponding hierarchy is obtained simply by ordering the effects  
4 from the largest to the smallest (or in ascending order, if the outcome is harmful). The  
5 resulting hierarchy is identical to that obtained using relative effects from the conventional  
6 NMA model. In the rest of the manuscript, we will refer to this ranking metric simply as  
7 relative treatment effect.  
8  
9  
10  
11  
12  
13  
14

### 15 Agreement between ranking metrics

16  
17 To estimate the level of agreement between the treatment hierarchies obtained using the  
18 three chosen ranking methods we employed several correlation and similarity measures.  
19  
20  
21  
22

23 To assess the correlation between ranking metrics we used Kendall's  $\tau$  [15] and the  
24 Spearman's  $\rho$  [16]. Both Kendall's  $\tau$  and Spearman's  $\rho$  give the same weight to each item in  
25 the ranking. In the context of treatment ranking, the top of the ranking is more important  
26 than the bottom. We therefore also used a top-weighted variant of Kendall's  $\tau$ , Yilmaz  $\tau_{AP}$   
27 [17], which is based on a probabilistic interpretation of the average precision measure used  
28 in information retrieval [18] (see Appendix).  
29  
30  
31  
32  
33  
34  
35  
36  
37

38 The measures described so far can only be considered for conjoint rankings, i.e. for lists where  
39 each item in one list is also present in the other list. Rankings are *non-conjoint* when a ranking  
40 is truncated to a certain *depth*  $k$  with such lists called *top-k rankings*. We calculated the  
41 Average Overlap [19,20], a top-weighted measure for top-k rankings that considers the  
42 cumulative intersection (or *overlap*) between the two lists and averages it over a specified  
43 depth (cut-off point)  $k$  (see Appendix for details). We calculated the Average Overlap between  
44 pairs of rankings for networks with at least six treatments (139 networks) for a depth  $k$  equal  
45 to half the number of treatments in the network,  $k = T/2$  (or  $((T - 1)) / 2$  if  $T$  is an odd  
46 number).  
47  
48  
49  
50  
51  
52  
53  
54  
55  
56  
57  
58  
59  
60

1  
2  
3 We calculated the four measures described above to assess the pairwise agreement between  
4 the three ranking metrics within the frequentist setting and summarised them for each pair  
5 of ranking metrics and each agreement measure using the median and the 1<sup>st</sup> and 3<sup>rd</sup>  
6 quartiles. The hierarchy according to *SUCRA*<sup>B</sup> was compared to that of its frequentist  
7 equivalent to check how often the two disagree.  
8  
9  
10  
11  
12  
13  
14

### 15 Influence of network features on the rankings agreement

16  
17  
18 The main network characteristic considered was the amount of information in the network  
19 (reflected in the precision of the estimates). Therefore, for each network we calculated the  
20 following measures of information:  
21  
22  
23

- 24 • the average variance, calculated as the mean of the variances of the estimated  
25 treatment effects  $mean(SE^2)$ , to show how much information is present in a network  
26 altogether;  
27  
28
- 29 • the relative range of variance, calculated as  $\frac{\max SE^2 - \min SE^2}{\max SE^2}$ , to describe differences in  
30 information about each intervention within the same networks;  
31  
32
- 33 • the total sample size of a network over the number of interventions.  
34  
35  
36  
37  
38  
39  
40

41 These measures are presented in scatter plots against the agreement measurements for pairs  
42 of ranking metrics.  
43  
44

45 All the codes for the empirical evaluation are available at <https://github.com/esm-ism-unibe-ch/rankingagreement>.  
46  
47  
48  
49

## 50 ILLUSTRATIVE EXAMPLE

51  
52 To illustrate the impact of the amount of information on the treatment hierarchies from  
53 different ranking metrics, we used a network of nine antihypertensive treatments for primary  
54 prevention of cardiovascular disease that presents large differences in the precision of the  
55  
56  
57  
58  
59  
60

1  
2  
3 estimates of overall mortality [21]. The network graph and forest plot of relative treatment  
4 effects of each treatment versus placebo are presented in **Figure 1**. The relative treatment  
5 effects reported are risk ratios (RR) estimated using a random effects NMA model.  
6  
7  
8  
9

10 **Table 1** shows the treatment hierarchies obtained using the three ranking metrics described  
11 above. The highest overall agreement is between hierarchies from the  $SUCRA^F$  and the  
12 relative treatment effect as shown by both correlation (Spearman's  $\rho = 0.93$ , Kendall's  $\tau =$   
13  $0.87$ ) and top-weighted measures (Yilmaz's  $\tau_{AP} = 0.87$ ; Average Overlap =  $0.85$ ). The level of  
14 agreement decreases when  $SUCRA^F$  and the relative treatment effect are compared with  
15  $p_{BV}$  rankings (Spearman's  $\rho = 0.63$  and  $\rho = 0.85$  respectively). Agreement with  $p_{BV}$  especially  
16 decreases when considering top ranks only (Average Overlap is  $0.48$  for  $p_{BV}$  versus  $SUCRA^F$   
17 and  $0.54$  for  $p_{BV}$  versus relative treatment effect). All agreement measures are presented in  
18 online supplementary **Table S1**.  
19  
20  
21  
22  
23  
24  
25  
26  
27  
28  
29  
30  
31

32 The reason for this disagreement is explained by the differences in precision in the estimated  
33 effects (**Figure 1**). These RRs versus placebo range from  $0.82$  (Diuretic/Beta-blocker versus  
34 placebo) to  $0.98$  (Beta-blocker versus placebo). All estimates are fairly precise except for the  
35 RR of conventional therapy versus placebo whose 95% confidence interval extends from  $0.21$   
36 to  $3.44$ . This uncertainty in the estimation is due to the fact that conventional therapy is  
37 compared only with Angiotensin Receptor Blockers (ARB) via a single study. This large  
38 difference in the precision of the estimation of the treatment effects mostly affects the  $p_{BV}$   
39 ranking, which disagrees the most with both of the other rankings. Consequently, the  
40 Conventional therapy is in the first rank in the  $p_{BV}$  hierarchy (because of the large uncertainty)  
41 but only features in the third/fourth and sixth rank using the relative treatment effects and  
42  $SUCRA^F$  hierarchies, respectively.  
43  
44  
45  
46  
47  
48  
49  
50  
51  
52  
53  
54  
55  
56  
57  
58  
59  
60

To explore how the hierarchies for this network would change in case of increased precision, we reduced the standard error of the Conventional versus ARB treatment effect from the original 0.7 to a fictional value of 0.01 resulting in a confidence interval 0.77 to 0.96. The columns in the right-hand side of **Table 1** display the three equivalent rankings after the standard error reduction. The conventional treatment has moved up in the hierarchy according to  $SUCRA^F$  and moved down in the one based on  $p_{BV}$ , as expected. The treatment hierarchies obtained from the  $SUCRA^F$  and the relative treatment effect are now identical (Conventional and ARB share the 3.5 rank because they have the same effect estimate) and the agreement with the  $p_{BV}$  rankings also improved ( $p_{BV}$  versus  $SUCRA^F$  Spearman's  $\rho = 0.89$ , Average Overlap = 0.85;  $p_{BV}$  versus relative treatment effect Spearman's  $\rho = 0.91$ , Average Overlap = 0.94; online supplementary **Table S1**).

## RESULTS

A total of 232 networks were included in our dataset. Their characteristics are shown in **Table 2**. The majority of networks (133 NMAs, 57.3%) did not report any ranking metrics in the original publication. Among those which used a ranking metric to produce a treatment hierarchy, the probability of being the best was the most popular metric followed by the SUCRA with 35.8% and 6.9% of networks reporting them, respectively.

**Table 3** presents the medians and quartiles for each similarity measures. All hierarchies showed a high level of pairwise agreement, although the hierarchies obtained from the  $SUCRA^F$  and the relative treatment effect presented the highest values for both unweighted and with top-weighted measures (all measures' median equals 1). Only 4 networks (less than 2%) had a Spearman's correlation between  $SUCRA^F$  and the relative treatment effect less than 90% (not reported). The correlation becomes less between the  $p_{BV}$  rankings and those

1  
2  
3 obtained from the other two ranking metrics with Spearman's  $\rho$  median decreasing to 0.9  
4 and Kendall's  $\tau$  decreasing to 0.8. The Spearman's correlation between these rankings was  
5  
6 less than 90% in about 50% of the networks (in 116 and 111 networks for  $p_{BV}$  versus  $SUCRA^F$   
7  
8 and  $p_{BV}$  versus relative effect, respectively; results not reported). The pairwise agreement  
9  
10 between the  $p_{BV}$  rankings and the other rankings also decreased when considering only top  
11  
12 ranks ( $p_{BV}$  versus  $SUCRA^F$  Yilmaz's  $\tau_{AP} = 0.77$ , Average Overlap = 0.83;  $p_{BV}$  versus relative  
13  
14 treatment effect Yilmaz's  $\tau_{AP} = 0.79$ , Average Overlap = 0.88).

15  
16 The SUCRAs from frequentist and Bayesian settings ( $SUCRA^F$  and  $SUCRA^B$ ) were compared  
17  
18 in 126 networks (82 networks using the Average Overlap measure) as these reported OR and  
19  
20 SMD as original measures. The relevant rankings do not differ much as shown by the median  
21  
22 values of the agreement measures all equal to 1 and their narrow interquartile ranges (**Table**  
23  
24 **3**). Nevertheless, a few networks showed a much lower agreement between the two SUCRAs.  
25  
26 These networks provide posterior effect estimates for which the Normal approximation is not  
27  
28 optimal. Such cases were however uncommon as in only 6% of the networks the Spearman's  
29  
30 correlation between  $SUCRA^F$  and  $SUCRA^B$  was less than 90%. Plots for the Normal  
31  
32 distributions from the frequentist setting and the posterior distributions of the log odds-ratios  
33  
34 (LOR) for a network with a Spearman's  $\rho$  of 0.6 between the two SUCRAs is available in online  
35  
36 supplementary **Figure S1** [22].

37  
38 **Figure 2** presents how Spearman's  $\rho$  and the Average Overlap vary with the average variance  
39  
40 of the relative treatment effect estimates in a network (scatter plots for the Kendall's  $\tau$  and  
41  
42 the Yilmaz's  $\tau_{AP}$  are available in online supplementary **Figure S2**). The treatment hierarchies  
43  
44 agree more in networks with more precise estimates (left hand side of the plots).

45  
46 The association between Spearman's  $\rho$  or Average Overlap and the relative range of variance  
47  
48 in a network (here transformed to a double logarithm of the inverse values) are displayed in  
49  
50  
51  
52  
53  
54  
55  
56  
57  
58  
59  
60

1  
2  
3 **Figure 3.** On the right-hand side of each plot we can find networks with smaller differences in  
4 the precision of the treatment effect estimates. Treatment hierarchies for these networks  
5 show a larger agreement than for those with larger differences in precision. The plots of the  
6 impact of the relative range of variance on all measures are available in online supplementary  
7 **Figure S3.**

8  
9  
10  
11  
12  
13  
14  
15 The total sample size in a network over the number of interventions has a similar impact on  
16 the level of agreement between hierarchies. This confirms that the agreement between  
17 hierarchies increases for networks with a large total sample size compared to the number of  
18 treatments and, more generally, it increases with the amount of information present in a  
19 network (online supplementary **Figure S4**).

## 28 DISCUSSION

29  
30  
31  
32 Our empirical evaluation showed that in practice the level of agreement between treatment  
33 hierarchies is overall high for all ranking metrics used. The agreement between treatment  
34 hierarchies from *SUCRA* and relative treatment effect was very often perfect. The agreement  
35 between the rankings from *SUCRA* or relative treatment effect and the ranking from  $p_{BV}$  was  
36 good but decreased when the top-ranked interventions are of interest. The agreement is  
37 higher for networks with precise estimates and small imbalances in precision.

38  
39  
40  
41  
42  
43  
44  
45  
46  
47  
48  
49  
50  
51  
52  
53  
54  
55  
56  
57  
58  
59  
60  
Several factors can be responsible for imprecision in the estimation of the relative treatment effects in a network:

- large sampling error, determined by a small sample size, small number of events or a large standard deviation;
- poor connectivity of the network, when only a few links and few closed loops of evidence connect the treatments;



- residual inconsistency;
- heterogeneity in the relative treatment effects.

Random-effects models tend to provide relative treatment effects with similar precision as heterogeneity increases. In contrast, in the absence of heterogeneity when fixed-effects models are used, the precision of the effects can vary a lot according to the amount of data available for each intervention. In the latter case, the ranking metrics are likely to disagree.

Our results also confirm that a treatment hierarchy can differ when the uncertainty in the estimation is incorporated into the ranking metric [8,23] and that rankings from the  $p_{BV}$  seem to be the most sensitive to differences in precision in the estimation of treatment effects. We showed graphically that the agreement is less in networks with more uncertainty and with larger imbalances in the variance estimates. However, we also found that such large imbalances do not occur frequently in real data and in the majority of cases the different treatment hierarchies have a relatively high agreement.

We acknowledge that there could be other factors influencing the agreement between hierarchies that we did not explore, such as the risk of bias [23,24] and the chosen effect measures [25]. However, we think it is unlikely that such features play a big role in ranking agreement unless assumptions are violated or data in the network is sparse [26].

To our knowledge, this is the first empirical study assessing the level of agreement between treatment hierarchies from ranking metrics in NMA and it provides further insights into the properties of the different methods. In this context, it is important to stress that neither the objective nor the findings of this empirical evaluation imply that a hierarchy for a particular metric works better or is more accurate than one obtained from another ranking metric. The reason why this sort of comparison cannot be made is that each ranking metric address a specific treatment hierarchy problem. For example, the *SUCRA* ranking addresses the issue

1  
2  
3 of which treatment outperforms most of the competing interventions, while the ranking  
4  
5 based on the relative treatment effect gives an answer to the problem of which treatment is  
6  
7 associated with the largest average effect for the outcome considered.  
8  
9

10 Our study shows that, despite theoretical differences between ranking metrics and some  
11  
12 extreme examples, they produce very similar treatment hierarchies in published networks. In  
13  
14 networks with large amount of data for each treatment, hierarchies based on SUCRA or the  
15  
16 relative treatment effect will almost always agree. Large imbalances in the precision of the  
17  
18 treatment effect estimates do not occur often enough to motivate a choice between the  
19  
20 different ranking metrics. Therefore, our advice to researchers presenting results from NMA  
21  
22 is the following: *if the NMA estimated effects are precise*, to use the ranking metric they  
23  
24 prefer; *if at least one NMA estimated effect is imprecise*, to refrain from making bold  
25  
26 statements about treatment hierarchy and present hierarchies from both probabilistic (e.g.  
27  
28 SUCRA or rank probabilities) and non-probabilistic metrics (e.g. relative treatments effects).  
29  
30  
31  
32  
33

### 34 35 Author contributions

36 VC designed the study, analysed the data, interpreted the results of the empirical evaluation,  
37  
38 and drafted the manuscript. GS designed the study, interpreted the results of the empirical  
39  
40 evaluation and revised the manuscript. AN provided input into the study design and the data  
41  
42 analysis, interpreted the results of the empirical evaluation and revised the manuscript. TP  
43  
44 developed and manages the database where networks' data was accessed, provided input  
45  
46 into the data analysis and revised the manuscript. ME provided input into the study design  
47  
48 and revised the manuscript. All the authors approved the final version of the submitted  
49  
50 manuscript.  
51  
52  
53  
54  
55  
56  
57  
58  
59  
60

### Funding

This work was supported by the Swiss National Science Foundation grant/award number 179158.

### Competing Interests

All authors have completed the ICMJE uniform disclosure form and declare: all authors had financial support from the Swiss National Science Foundation for the submitted work; no financial relationships with any organizations that might have an interest in the submitted work in the previous three years; no other relationships or activities that could appear to have influenced the submitted work.

### Patient consent for publication

Not required.

### Data sharing statement

The data for the network meta-analyses included in this study are available in the database accessible using the *nadb* R package [11].

## References

- 1 Eftimiou O, Debray TPA, van Valkenhoef G, *et al.* GetReal in network meta-analysis: a review of the methodology: reviewNMA. *Res Synth Methods* 2016;**7**:236–63. doi:10.1002/jrsm.1195
- 2 Del Fiol G, Workman TE, Gorman PN. Clinical questions raised by clinicians at the point of care: a systematic review. *JAMA Intern Med* 2014;**174**:710–8. doi:10.1001/jamainternmed.2014.368
- 3 Salanti G, Ades AE, Ioannidis JPA. Graphical methods and numerical summaries for presenting results from multiple-treatment meta-analysis: an overview and tutorial. *J Clin Epidemiol* 2011;**64**:163–71. doi:10.1016/j.jclinepi.2010.03.016
- 4 Rucker G, Schwarzer G. Ranking treatments in frequentist network meta-analysis works without resampling methods. *BMC Med Res Methodol* 2015;**15**:58. doi:10.1186/s12874-015-0060-8
- 5 Trinquart L, Attiche N, Bafeta A, *et al.* Uncertainty in Treatment Rankings: Reanalysis of Network Meta-analyses of Randomized Trials. *Ann Intern Med* 2016;**164**:666–73. doi:10.7326/M15-2521
- 6 Kibret T, Richer D, Beyene J. Bias in identification of the best treatment in a Bayesian network meta-analysis for binary outcome: a simulation study. *Clin Epidemiol* 2014;**6**:451–60. doi:10.2147/CLEP.S69660
- 7 Veroniki AA, Straus SE, Rucker G, *et al.* Is providing uncertainty intervals in treatment ranking helpful in a network meta-analysis? *J Clin Epidemiol* 2018;**100**:122–9. doi:10.1016/j.jclinepi.2018.02.009
- 8 Jansen JP, Trikalinos T, Cappelleri JC, *et al.* Indirect Treatment Comparison/Network Meta-Analysis Study Questionnaire to Assess Relevance and Credibility to Inform Health Care Decision Making: An ISPOR-AMCP-NPC Good Practice Task Force Report. *Value Health* 2014;**17**:157–73. doi:10.1016/j.jval.2014.01.004
- 9 Petropoulou M, Nikolakopoulou A, Veroniki A-A, *et al.* Bibliographic study showed improving statistical methodology of network meta-analyses published between 1999 and 2015. *J Clin Epidemiol* 2017;**82**:20–8. doi:10.1016/j.jclinepi.2016.11.002
- 10 Nikolakopoulou A, Chaimani A, Veroniki AA, *et al.* Characteristics of networks of interventions: a description of a database of 186 published networks. *PloS One* 2014;**9**:e86754. doi:10.1371/journal.pone.0086754
- 11 Papakonstantinou T. *nmadb: Network Meta-Analysis Database API*. 2019. <https://CRAN.R-project.org/package=nmadb>
- 12 Rucker G, Krahn U, König J, *et al.* *netmeta: Network Meta-Analysis using Frequentist Methods*. 2019. <https://github.com/guido-s/netmeta> <http://meta-analysis-with-r.org>.
- 13 Hosmer DW, Lemeshow S. *Applied Logistic Regression: Hosmer/Applied Logistic Regression*. Hoboken, NJ, USA: : John Wiley & Sons, Inc. 2000. doi:10.1002/0471722146
- 14 Nikolakopoulou A, Mavridis D, Chiochia V, *et al.* PreTA: A network meta-analysis ranking metric measuring the probability of being preferable than the average treatment. *Res Synth Methods* (submitted).
- 15 Kendall MG. THE TREATMENT OF TIES IN RANKING PROBLEMS. *Biometrika* 1945;**33**:239–51. doi:10.1093/biomet/33.3.239
- 16 Spearman C. The Proof and Measurement of Association between Two Things. *Am J Psychol* 1904;**15**:72. doi:10.2307/1412159
- 17 Yilmaz E, Aslam JA, Robertson S. A new rank correlation coefficient for information retrieval. In: *Proceedings of the 31st annual international ACM SIGIR conference on Research and development in information retrieval - SIGIR '08*. Singapore, Singapore: : ACM Press 2008. 587. doi:10.1145/1390334.1390435

- 1  
2  
3 18 Yilmaz E, Aslam JA. Estimating Average Precision with Incomplete and Imperfect Judgments. In: *Proceedings of the 15th ACM International Conference on Information and Knowledge Management*. New York, NY, USA: : ACM 2006. 102–111. doi:10.1145/1183614.1183633
- 4  
5  
6  
7 19 Fagin R, Kumar R, Sivakumar D. Comparing Top K Lists. In: *Proceedings of the Fourteenth Annual ACM-SIAM Symposium on Discrete Algorithms*. Philadelphia, PA, USA: : Society for Industrial and Applied Mathematics 2003. 28–36. <http://dl.acm.org/citation.cfm?id=644108.644113> (accessed 15 May 2019).
- 8  
9  
10  
11 20 Wu S, Crestani F. Methods for Ranking Information Retrieval Systems Without Relevance Judgments. In: *Proceedings of the 2003 ACM Symposium on Applied Computing*. New York, NY, USA: : ACM 2003. 811–816. doi:10.1145/952532.952693
- 12  
13  
14  
15 21 Fretheim A, Odgaard-Jensen J, Brørs O, *et al*. Comparative effectiveness of antihypertensive medication for primary prevention of cardiovascular disease: systematic review and multiple treatments meta-analysis. *BMC Med* 2012;**10**:33. doi:10.1186/1741-7015-10-33
- 16  
17  
18  
19 22 Greco T, Calabrò MG, Covello RD, *et al*. A Bayesian network meta-analysis on the effect of inodilatory agents on mortality. *Br J Anaesth* 2015;**114**:746–56. doi:10.1093/bja/aeu446
- 20  
21  
22  
23 23 Chaimani A, Vasiliadis HS, Pandis N, *et al*. Effects of study precision and risk of bias in networks of interventions: a network meta-epidemiological study. *Int J Epidemiol* 2013;**42**:1120–31. doi:10.1093/ije/dyt074
- 24  
25  
26  
27 24 Trinquart L, Abbé A, Ravaud P. Impact of Reporting Bias in Network Meta-Analysis of Antidepressant Placebo-Controlled Trials. *PLoS ONE* 2012;**7**:e35219. doi:10.1371/journal.pone.0035219
- 28  
29  
30  
31 25 Norton EC, Miller MM, Wang JJ, *et al*. Rank Reversal in Indirect Comparisons. *Value Health* 2012;**15**:1137–40. doi:10.1016/j.jval.2012.06.001
- 32  
33  
34  
35 26 van Valkenhoef G, Ades AE. Evidence Synthesis Assumes Additivity on the Scale of Measurement: Response to “Rank Reversal in Indirect Comparisons” by Norton *et al*. *Value Health* 2013;**16**:449–51. doi:10.1016/j.jval.2012.11.012
- 36  
37  
38  
39 27 Urbano J, Marrero M. The Treatment of Ties in AP Correlation. In: *Proceedings of the ACM SIGIR International Conference on Theory of Information Retrieval - ICTIR '17*. Amsterdam, The Netherlands: : ACM Press 2017. 321–4. doi:10.1145/3121050.3121106
- 40  
41  
42  
43  
44  
45  
46  
47  
48  
49  
50  
51  
52  
53  
54  
55  
56  
57  
58  
59  
60

**Table 1: Example of treatment hierarchies from different ranking metrics for a network of nine antihypertensive treatment for primary prevention of cardiovascular disease [21].**

| Treatment             | Original data  |                 |                                 | Fictional data with increased precision for Conventional treatment versus ARB |                 |                                 |
|-----------------------|----------------|-----------------|---------------------------------|-------------------------------------------------------------------------------|-----------------|---------------------------------|
|                       | $p_{BV}$ ranks | $SUCRA_F$ ranks | Relative treatment effect ranks | $p_{BV}$ ranks                                                                | $SUCRA_F$ ranks | Relative treatment effect ranks |
| Conventional          | 1              | 6               | 3.5                             | 3                                                                             | 4               | 3.5                             |
| Diuretic/Beta-blocker | 2              | 1               | 1                               | 1                                                                             | 1               | 1                               |
| ARB                   | 3              | 3               | 3.5                             | 4.5                                                                           | 3               | 3.5                             |
| CCB                   | 4              | 2               | 2                               | 2                                                                             | 2               | 2                               |
| Alpha-blocker         | 5              | 7               | 7                               | 4.5                                                                           | 7               | 7                               |
| ACE-inhibitor         | 6              | 4               | 5                               | 6.5                                                                           | 5               | 5                               |
| Diuretic              | 7              | 5               | 6                               | 6.5                                                                           | 6               | 6                               |
| Placebo               | 8.5            | 9               | 9                               | 8.5                                                                           | 9               | 9                               |
| Beta-Blocker          | 8.5            | 8               | 8                               | 8.5                                                                           | 8               | 8                               |

ACE=Angiotensin Converting Enzyme; CCB=Calcium Channel Blockers; ARB=Angiotensin Receptor Blockers.  $p_{BV}$ : probability of producing the best value;  $SUCRA_F$ : surface under the cumulative ranking curve (calculated in frequentist setting); relative treatment effect stands for the relative treatment effect against fictional treatment of average performance. The first three rankings from the left-hand side are obtained using the original data; the equivalent three rankings on the right-hand side are produced by reducing the standard error of the Conventional versus ARB treatment effect from 0.7 to a fictional value of 0.01.

**Table 2: Characteristics of the 232 NMAs included in the re-analysis.**

| Characteristics of networks                                  | Median         | IQR           |
|--------------------------------------------------------------|----------------|---------------|
| Median number of treatments compared                         | 6              | (5, 9)        |
| Median number of studies included                            | 19             | (12, 34)      |
| Median total sample size                                     | 6100           | (2514, 17264) |
|                                                              | Number of NMAs | %             |
| Beneficial outcome                                           | 97             | 41.8%         |
| Dichotomous outcome                                          | 185            | 79.7%         |
| Continuous outcome                                           | 47             | 20.3%         |
| Published before 2010                                        | 42             | 18.1%         |
| Ranking metric used in original publication (non-exclusive): |                |               |
| Probability of producing the best value                      | 83             | 35.8%         |
| Rankograms                                                   | 7              | 3%            |
| Median or mean rank                                          | 3              | 1.3%          |
| SUCRA                                                        | 16             | 6.9%          |
| Other                                                        | 2              | 0.9%          |
| None                                                         | 133            | 57.3%         |

|                                                 |     |       |
|-------------------------------------------------|-----|-------|
| Published in general medicine journals†         | 125 | 53.9% |
| Published in health services research journals‡ | 3   | 1.3%  |
| Published in specialty journals                 | 104 | 44.8% |

IQR: interquartile range; NMA: network meta-analysis; SUCRA: surface under the cumulative ranking curve.

† Includes the categories Medicine, General & Internal, Pharmacology & Pharmacy, Research & Experimental, Primary Health Care.

‡ Includes the categories Health Care Sciences & Services, Health Policy & Services.

**Table 3: Pairwise agreement between treatment hierarchies obtained from the different ranking metrics measured by Spearman  $\rho$ , Kendall  $\tau$ , Yilmaz  $\tau_{AP}$  and Average Overlap.**

|                                      | $p_{BV}$ vs $SUCRA_F$ | $SUCRA_F$ vs relative treatment effect | $p_{BV}$ vs relative treatment effect | $SUCRA_F$ vs $SUCRA_B$ |
|--------------------------------------|-----------------------|----------------------------------------|---------------------------------------|------------------------|
| <b>Spearman <math>\rho</math></b>    | 0.9 (0.8, 0.96)       | 1 (0.99, 1)                            | 0.9 (0.8, 0.97)                       | 1 (0.98, 1)            |
| <b>Kendall <math>\tau</math></b>     | 0.8 (0.67, 0.91)      | 1 (0.95, 1)                            | 0.8 (0.69, 0.91)                      | 1 (0.93, 1)            |
| <b>Yilmaz <math>\tau_{AP}</math></b> | 0.78 (0.6, 0.9)       | 1 (0.93, 1)                            | 0.79 (0.65, 0.9)                      | 1 (0.93, 1)            |
| <b>Average Overlap</b>               | 0.85 (0.72, 0.96)     | 1 (0.91, 1)                            | 0.88 (0.79, 1)                        | 1 (0.94, 1)            |

Medians, 1<sup>st</sup> and 3<sup>rd</sup> quartiles are reported.  $p_{BV}$ : probability of producing the best value;  $SUCRA_F$ : surface under the cumulative ranking curve (calculated in frequentist setting);  $SUCRA_B$ : surface under the cumulative ranking curve (calculated in Bayesian setting); relative treatment effect stands for the relative treatment effect against fictional treatment of average performance.

**Figure 1: (left panel) Network graph of network of nine antihypertensive treatments for primary prevention of cardiovascular disease [21]. Line width is proportional to inverse standard error of random effects model comparing two treatments. (right panel) Forest plots of relative treatment effects of overall mortality for each treatment versus placebo. RR: risk ratio; ACE=Angiotensin Converting Enzyme; CCB=Calcium Channel Blockers; ARB=Angiotensin Receptor Blockers; SE=standard error.**

**Figure 2: Scatter plots of the average variance in a network and the pairwise agreement between hierarchies from different ranking metrics. The average variance is calculated as the mean of the variances of the estimated treatment effects and describes the average information present in a network. More imprecise network are on the right-hand side of the plots. Spearman  $\rho$  (top row) and Average Overlap (bottom row) values for the pairwise agreement between  $p_{BV}$  and  $SUCRA$  (first column),  $SUCRA$  and relative treatment effect (second column),  $p_{BV}$  and relative treatment effect (third column). Purple line: cubic smoothing spline with five degrees of freedom.**

**Figure 3: Scatter plots of the relative range of variance in a network and the pairwise agreement between hierarchies from different ranking metrics. The relative range of variance, calculated as  $\frac{\max SE^2 - \min SE^2}{\max SE^2}$ , indicates how much the information differs between interventions in the same networks. Networks with larger differences in variance are on the left-hand side of the plots. Spearman  $\rho$  (top row) and Average Overlap (bottom row) values for the pairwise agreement between  $p_{BV}$  and  $SUCRA$  (first column),  $SUCRA$  and relative treatment effect (second column),  $p_{BV}$  and relative treatment effect (third column). Purple line: cubic smoothing spline with five degrees of freedom.**

## APPENDIX

The Yilmaz's  $\tau_{AP}$  calculates the difference between the probability of observing concordance and the probability of observing discordance between two rankings X and Y, penalising more the discordance between top ranks. It can be computed as

$$\tau_{AP}(X, Y) = \frac{2}{N-1} \sum_{i=2}^N \sum_{j<i} \frac{c_{ij}}{i-1} - 1$$

where  $c_{ij}$  is 1 in case the items  $i$  and  $j$  are concordant and 0 otherwise;  $N$  is the total number of items in the ranking.

As Yilmaz's  $\tau_{AP}$  is not symmetric, the authors proposed an alternative measure that takes the average between the two  $\tau_{AP}$ , with the second being the one calculated after swapping the two rankings

$$\text{symm } \tau_{AP}(X, Y) = (\tau_{AP}(X|Y) + \tau_{AP}(Y|X))/2$$

As with the original Kendall's  $\tau$ , also the Yilmaz's  $\tau_{AP}$  formula above does not handle ties. Similarly, two formulations to account for this have been proposed [27] and we selected the one that considers correlation as a measure of agreement because more relevant for our purpose. In our chosen version of the Yilmaz's  $\tau_{AP}$ , the  $\tau_{AP,b}$ , neither of the two rankings is considered "true and objective" and ties can be present in either or both of them. The formula appears as follows

$$\tau_{AP,b} = (\tau_{AP,ties}(X|Y) + \tau_{AP,ties}(Y|X))/2 \quad \tau_{AP,ties} = \frac{2}{n-t_1} \sum_{i=t_1+1}^n \sum_{i<p_i} \frac{c_{ij}}{p_i-1} - 1$$

where  $t_1$  is the number of items tied in position  $i=1$  and  $p_i$  is the rank of the first item in  $i$ 's group.

The Average Overlap is a top-weighted measure for top-k rankings that considers the intersection (or *overlap*) between the two lists,  $|X \cap Y|/k$ . It calculates the cumulative



1  
2  
3 overlap at increasing depths  $d$ ,  $d \in \{1...k\}$  and average it over the depth (cut-off point)  $k$ .  
4  
5

$$6 \quad AO(X, Y, k) = \frac{1}{k} \sum_{d=1}^k A_d \quad \text{where } A_d = |X \cap Y|/d$$

7

8 Unlike the previous measures, the average overlap takes values between 0 and 1.  
9  
10  
11  
12  
13  
14  
15  
16  
17  
18  
19  
20  
21  
22  
23  
24  
25  
26  
27  
28  
29  
30  
31  
32  
33  
34  
35  
36  
37  
38  
39  
40  
41  
42  
43  
44  
45  
46  
47  
48  
49  
50  
51  
52  
53  
54  
55  
56  
57  
58  
59  
60

For peer review only

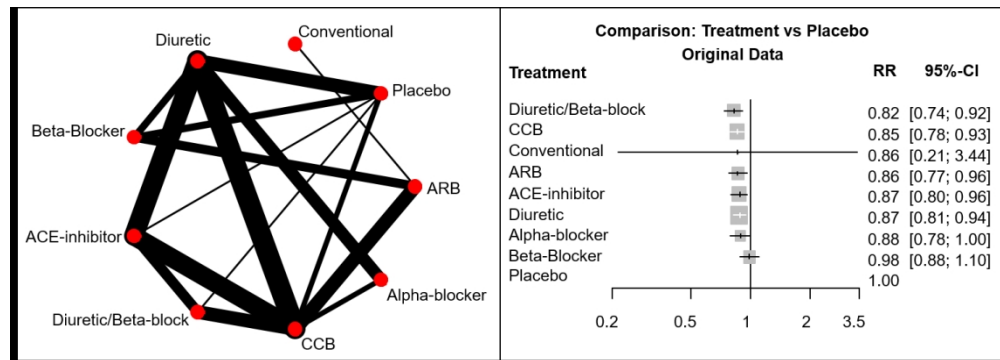

(left panel) Network graph of network of nine antihypertensive treatments for primary prevention of cardiovascular disease [21]. Line width is proportional to inverse standard error of random effects model comparing two treatments. (right panel) Forest plots of relative treatment effects of overall mortality for each treatment versus placebo. RR: risk ratio; ACE=Angiotensin Converting Enzyme; CCB=Calcium Channel Blockers; ARB=Angiotensin Receptor Blockers; SE=standard error.

258x92mm (150 x 150 DPI)

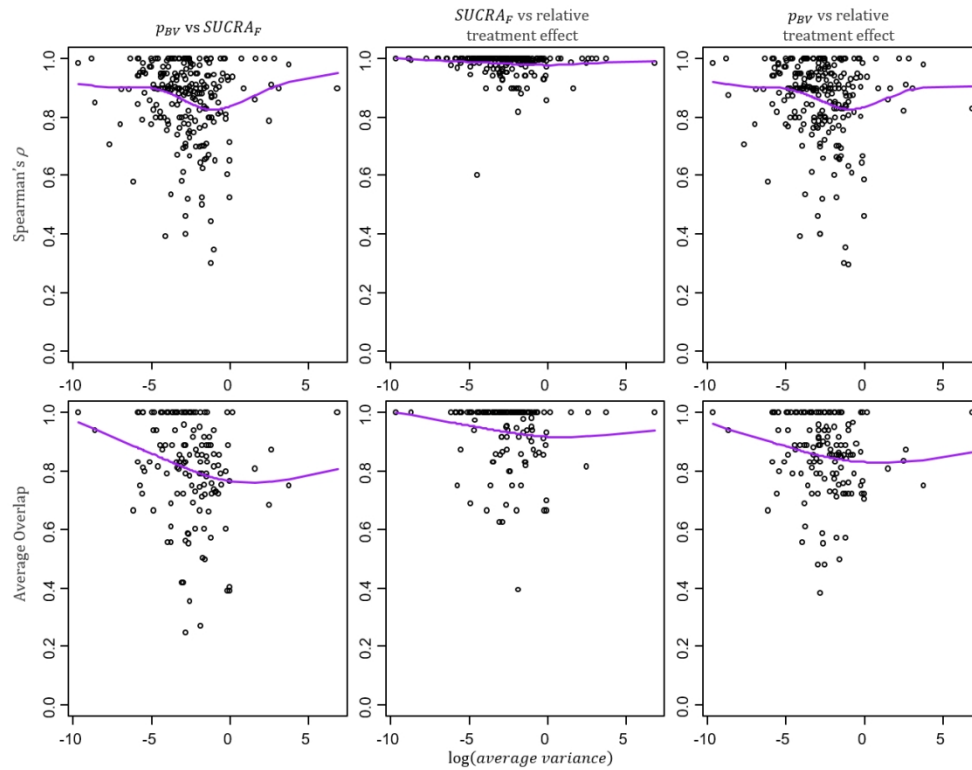

**Scatter plots of the average variance in a network and the pairwise agreement between hierarchies from different ranking metrics.** The average variance is calculated as the mean of the variances of the estimated treatment effects and describes the average information present in a network. More imprecise networks are on the right-hand side of the plots. Spearman  $\rho$  (top row) and Average Overlap (bottom row) values for the pairwise agreement between  $p_{BV}$  and  $SUCRA$  (first column),  $SUCRA$  and relative treatment effect (second column),  $p_{BV}$  and relative treatment effect (third column). Purple line: cubic smoothing spline with five degrees of freedom.

227x176mm (150 x 150 DPI)

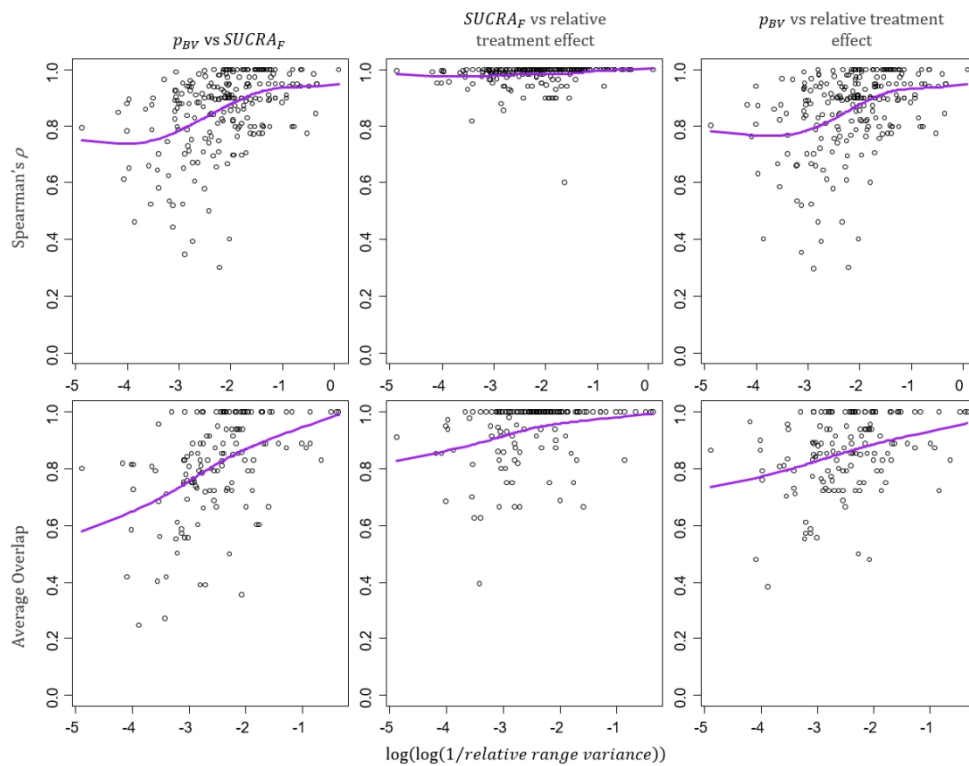

**Figure 3: Scatter plots of the relative range of variance in a network and the pairwise agreement between hierarchies from different ranking metrics.** The relative range of variance, calculated as  $(\max(SE^2) - \min(SE^2)) / \max(SE^2)$ , indicates how much the information differs between interventions in the same networks. Networks with larger differences in variance are on the left-hand side of the plots. Spearman  $\rho$  (top row) and Average Overlap (bottom row) values for the pairwise agreement between  $p_{BV}$  and SUCRA (first column), SUCRA and relative treatment effect (second column),  $p_{BV}$  and relative treatment effect (third column). Purple line: cubic smoothing spline with five degrees of freedom.

214x176mm (150 x 150 DPI)

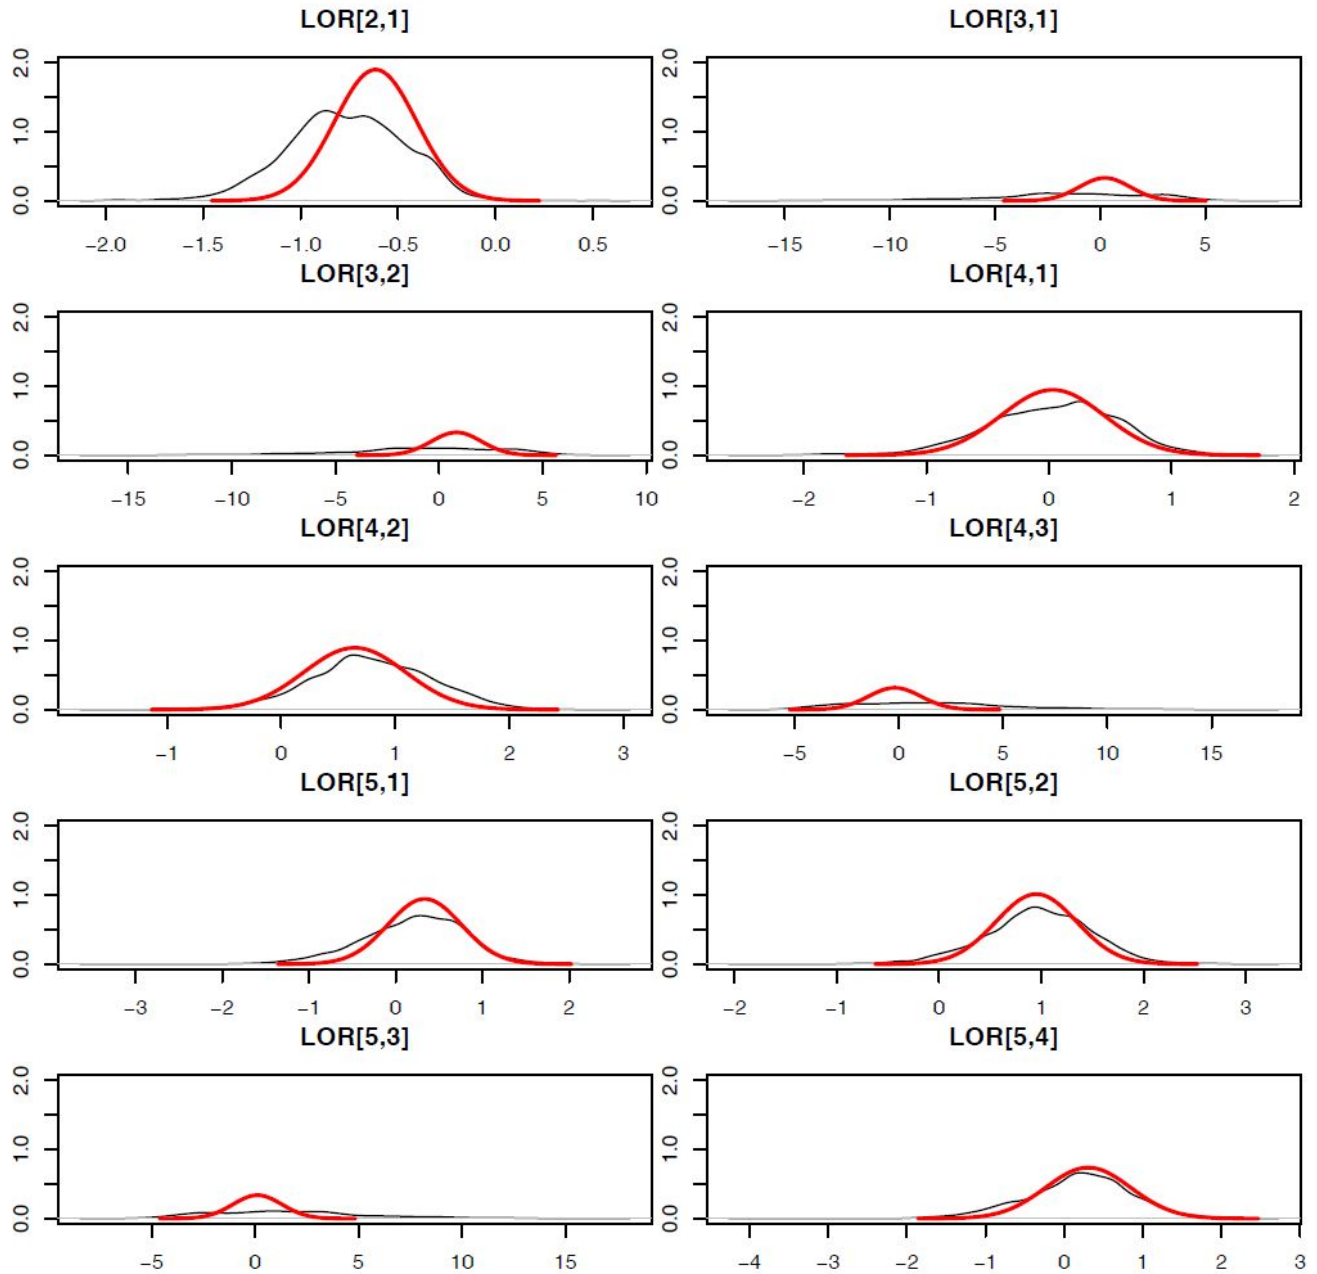

**Figure S1:** Normal distributions of relative treatment effect estimates from frequentist setting (red line) superimposed on posterior distributions of the relative treatment effects from Bayesian model (black line) for a network with Spearman's  $\rho$  of 0.6 between  $SUCRA_F$  and  $SUCRA_B$ . The network meta-analysis used analysed the effects of four inodilators and placebo on survival in adult cardiac surgery patients (Greco et al., Br J Anaesth 2015). LOR = log odds ratios; number in square brackets represents the different interventions in the network.

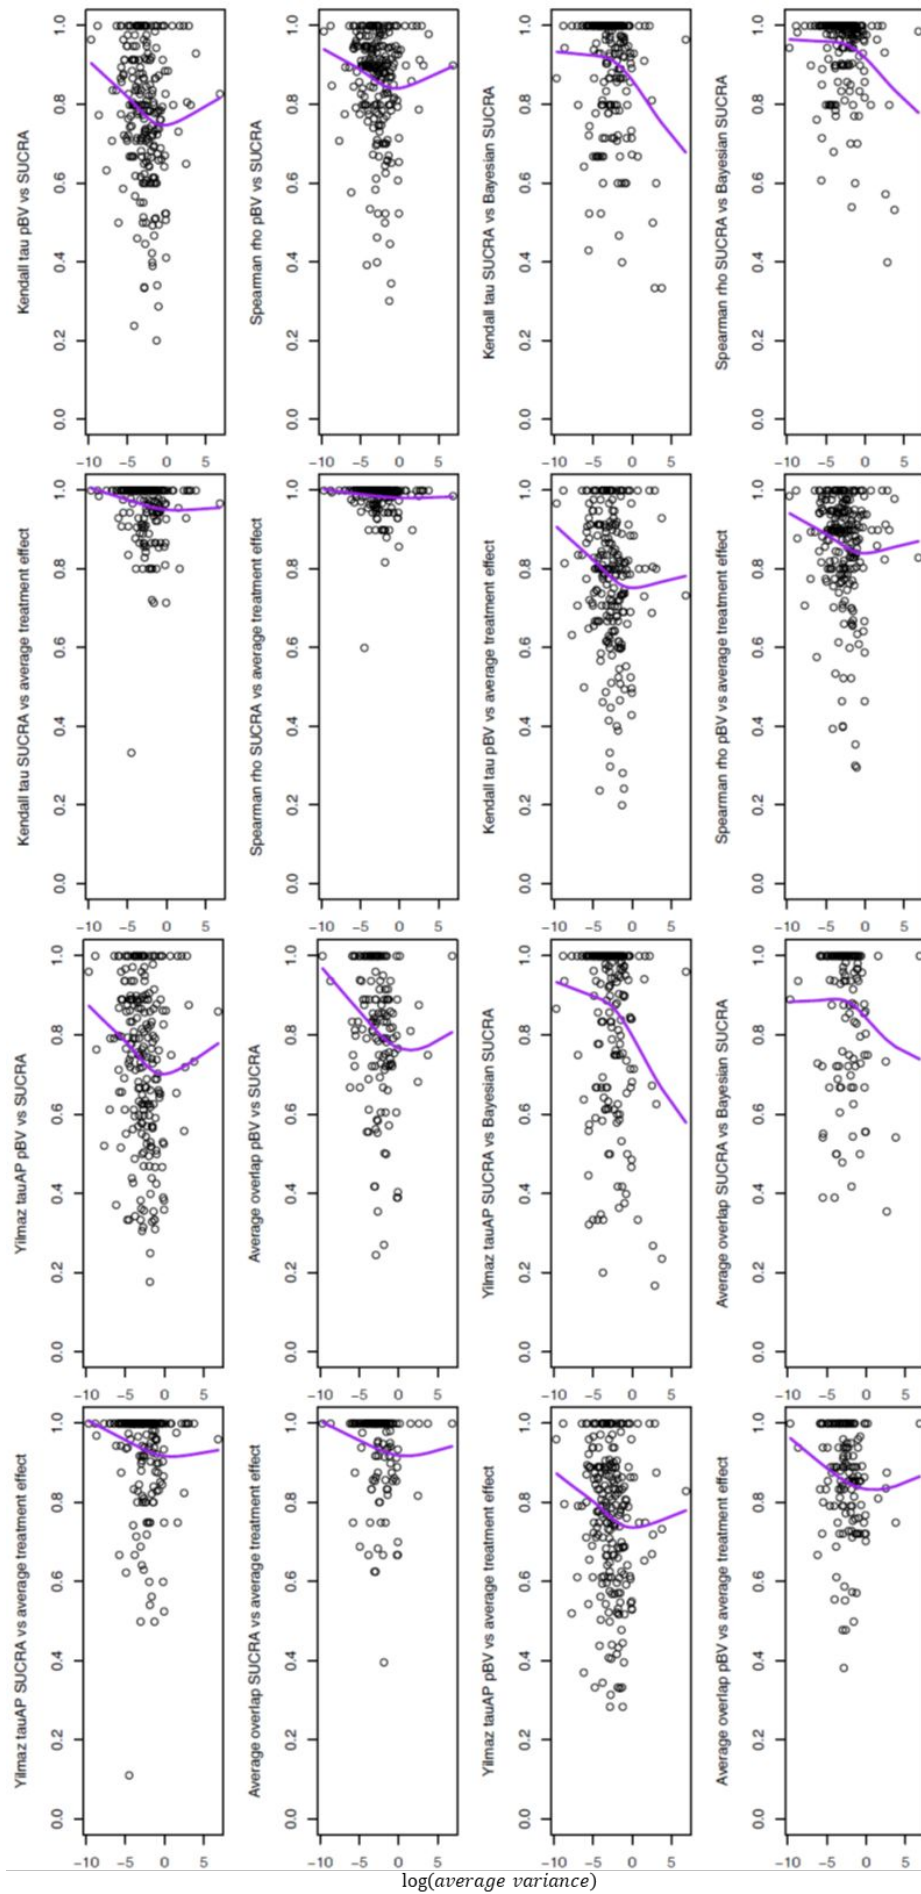

Figure S2: Scatter plots of the average variance in a network and the pairwise agreement between hierarchies from different ranking metrics.



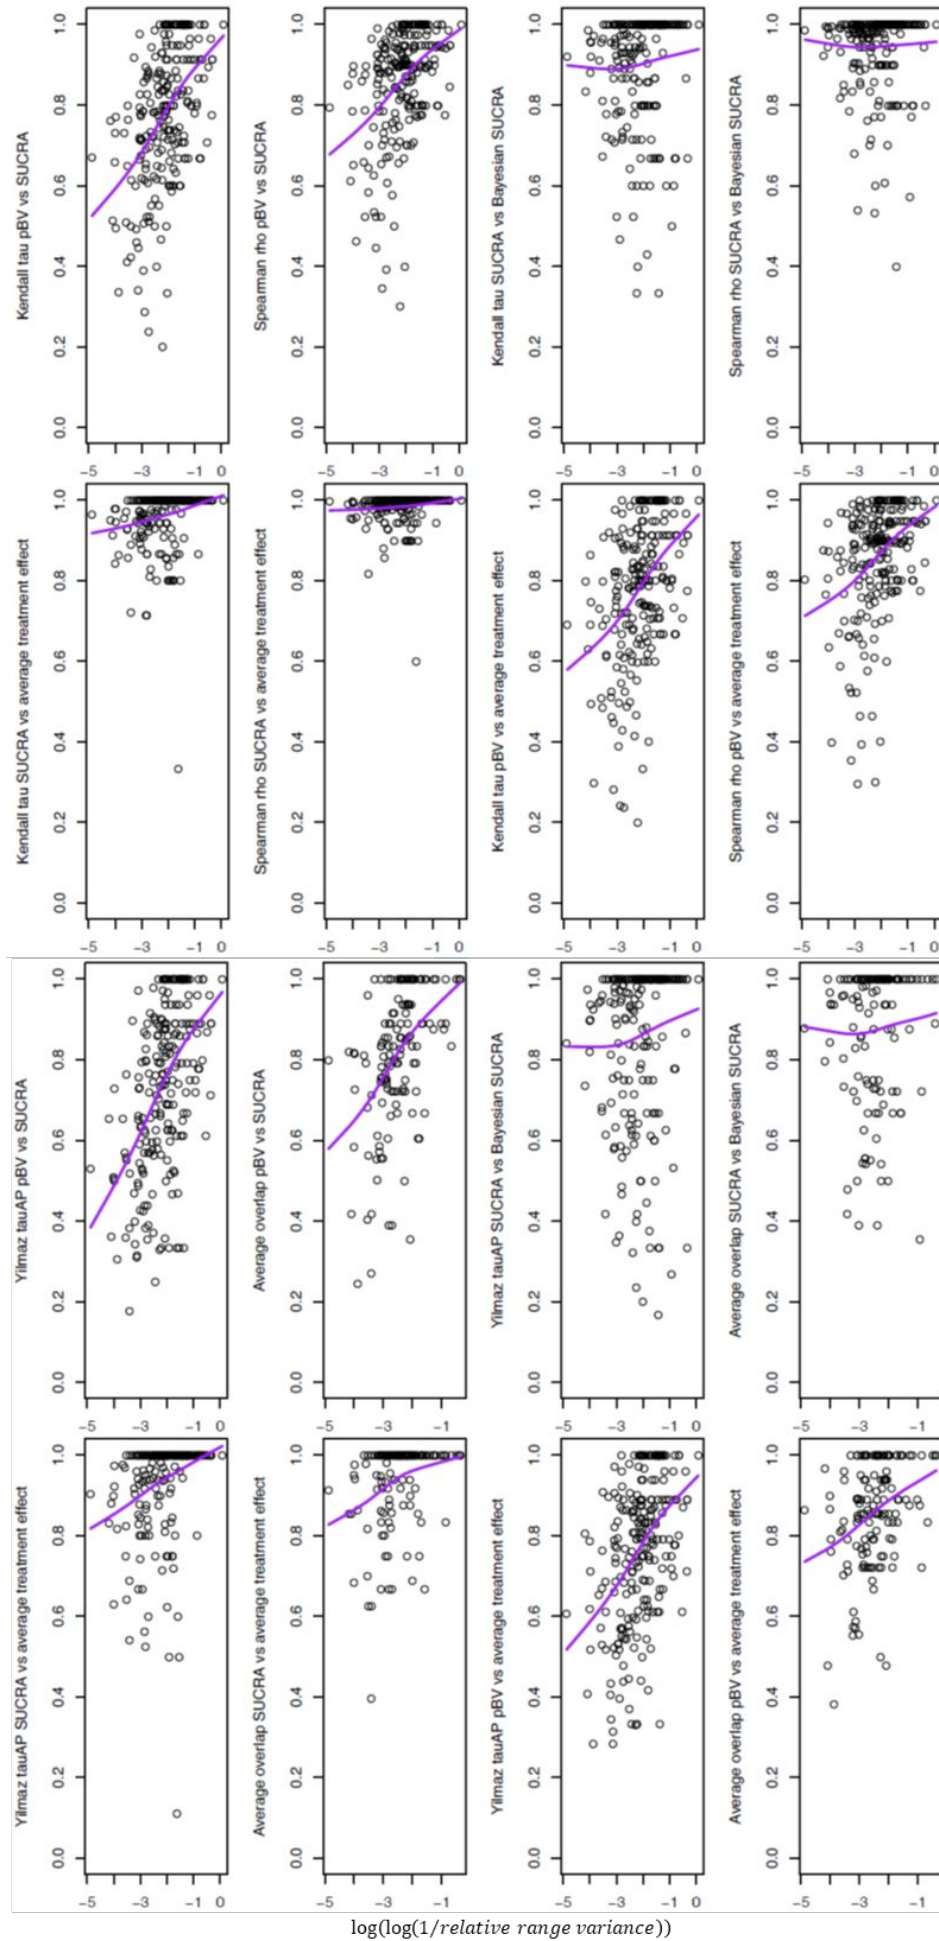

Figure S3: Scatter plots of the relative range of variance in a network and the pairwise agreement between hierarchies from different ranking metrics.

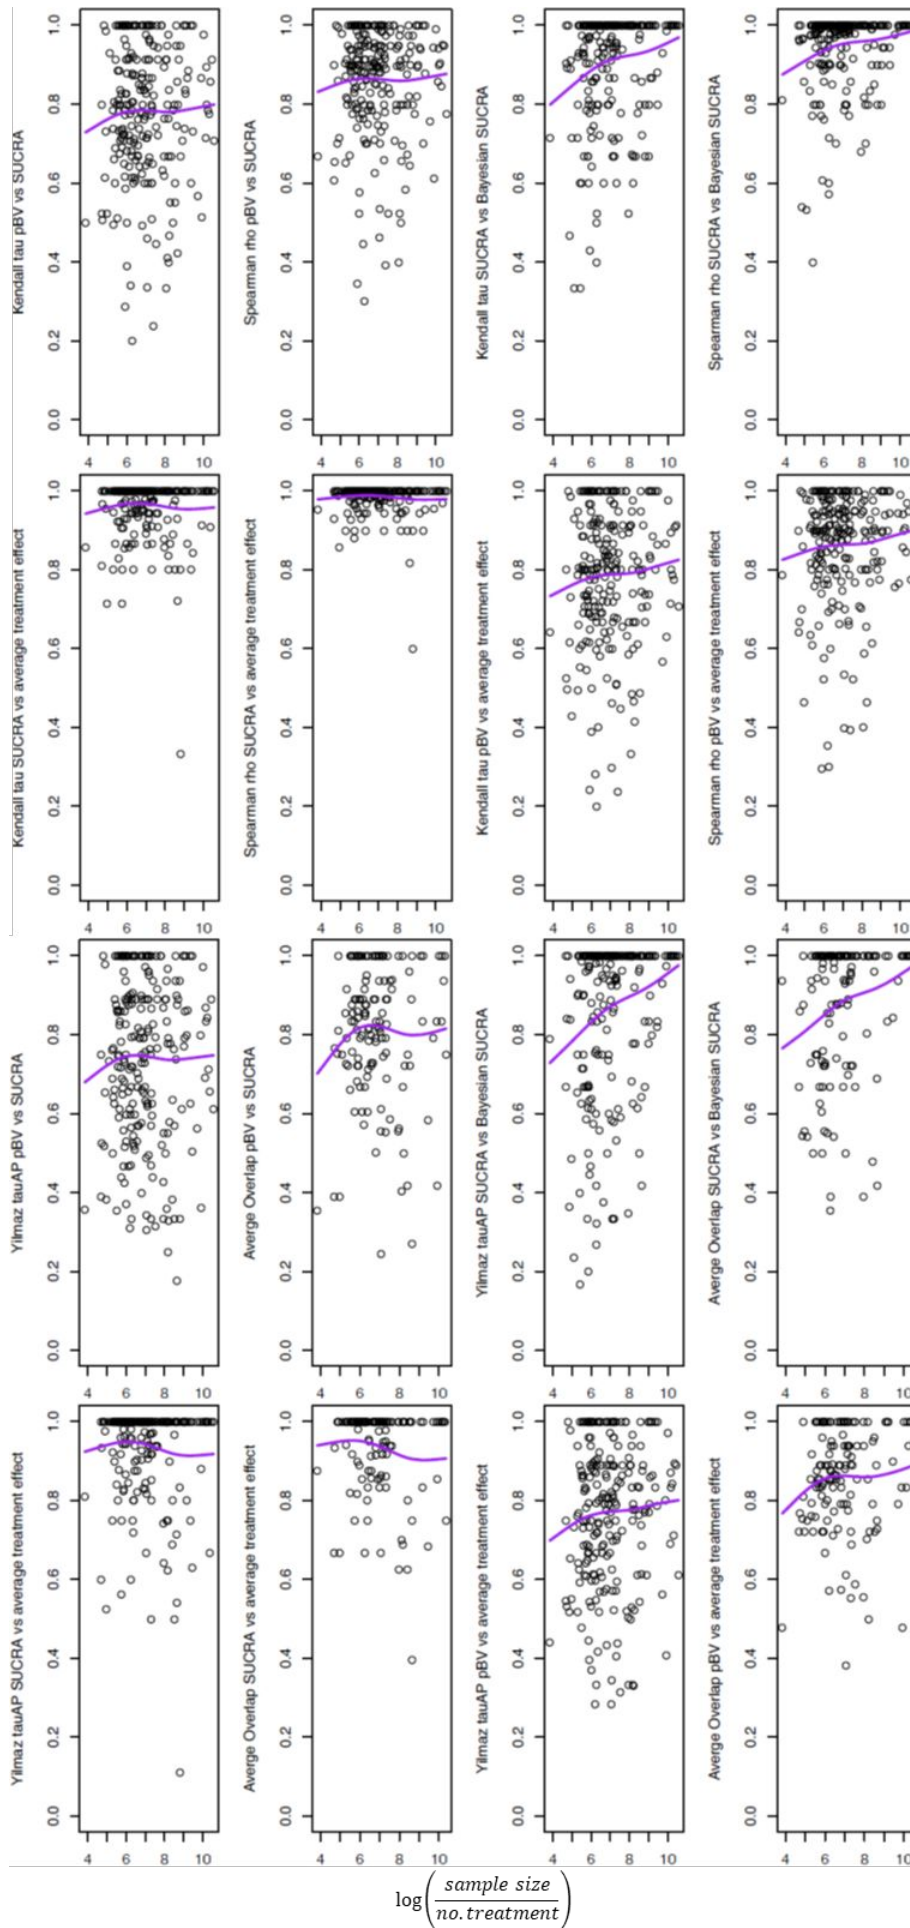

$$\log\left(\frac{\text{sample size}}{\text{no. treatment}}\right)$$

Figure S4: Scatter plots of the total sample size over the number of treatments in a network and the pairwise agreement between hierarchies from different ranking metrics.



**Table S1: Pairwise agreement between treatment hierarchies from illustrative network example.** Medians, 1<sup>st</sup> and 3<sup>rd</sup> quartiles are reported.  $p_{BV}$ : probability of producing the best value;  $SUCRA_F$ : surface under the cumulative ranking curve; relative treatment effect stands for the relative treatment effect against fictional treatment of average performance. The first three columns from the left-hand side present the agreements between rankings obtained using the original data; the equivalent three columns on the right-hand side show the agreements between rankings obtained after reducing the standard error of the Conventional versus ARB treatment effect from 0.7 to a fictional value of 0.01.

|                                      | Original data         |                                       |                                        | Fictional data with increased precision for Conventional treatment versus ARB |                                       |                                        |
|--------------------------------------|-----------------------|---------------------------------------|----------------------------------------|-------------------------------------------------------------------------------|---------------------------------------|----------------------------------------|
|                                      | $p_{BV}$ vs $SUCRA_F$ | $p_{BV}$ vs relative treatment effect | $SUCRA_F$ vs relative treatment effect | $p_{BV}$ vs $SUCRA_F$                                                         | $p_{BV}$ vs relative treatment effect | $SUCRA_F$ vs relative treatment effect |
| <b>Spearman <math>\rho</math></b>    | 0.64                  | 0.85                                  | 0.93                                   | 0.89                                                                          | 0.91                                  | 1                                      |
| <b>Kendall <math>\tau</math></b>     | 0.54                  | 0.69                                  | 0.87                                   | 0.78                                                                          | 0.82                                  | 0.99                                   |
| <b>Yilmaz <math>\tau_{AP}</math></b> | 0.39                  | 0.44                                  | 0.87                                   | 0.76                                                                          | 0.81                                  | 0.96                                   |
| <b>Average Overlap</b>               | 0.48                  | 0.54                                  | 0.85                                   | 0.85                                                                          | 0.94                                  | 0.92                                   |

# BMJ Open

## Agreement between ranking metrics in network meta-analysis: an empirical study

|                                 |                                                                                                                                                                                                                                                                                                                                                                                                                                                      |
|---------------------------------|------------------------------------------------------------------------------------------------------------------------------------------------------------------------------------------------------------------------------------------------------------------------------------------------------------------------------------------------------------------------------------------------------------------------------------------------------|
| Journal:                        | <i>BMJ Open</i>                                                                                                                                                                                                                                                                                                                                                                                                                                      |
| Manuscript ID                   | bmjopen-2020-037744.R1                                                                                                                                                                                                                                                                                                                                                                                                                               |
| Article Type:                   | Original research                                                                                                                                                                                                                                                                                                                                                                                                                                    |
| Date Submitted by the Author:   | 29-Jun-2020                                                                                                                                                                                                                                                                                                                                                                                                                                          |
| Complete List of Authors:       | Chiocchia, Virginia; University of Bern Institute of Social and Preventive Medicine<br>Nikolakopoulou, Adriani; University of Bern Institute of Social and Preventive Medicine<br>Papakonstantinou, Theodoros; University of Bern Institute of Social and Preventive Medicine<br>Egger, Matthias; University of Bern Institute of Social and Preventive Medicine<br>Salanti, Georgia; University of Bern Institute of Social and Preventive Medicine |
| <b>Primary Subject Heading</b>: | Epidemiology                                                                                                                                                                                                                                                                                                                                                                                                                                         |
| Secondary Subject Heading:      | Research methods                                                                                                                                                                                                                                                                                                                                                                                                                                     |
| Keywords:                       | STATISTICS & RESEARCH METHODS, EPIDEMIOLOGY, PUBLIC HEALTH                                                                                                                                                                                                                                                                                                                                                                                           |
|                                 |                                                                                                                                                                                                                                                                                                                                                                                                                                                      |

SCHOLARONE™  
Manuscripts



I, the Submitting Author has the right to grant and does grant on behalf of all authors of the Work (as defined in the below author licence), an exclusive licence and/or a non-exclusive licence for contributions from authors who are: i) UK Crown employees; ii) where BMJ has agreed a CC-BY licence shall apply, and/or iii) in accordance with the terms applicable for US Federal Government officers or employees acting as part of their official duties; on a worldwide, perpetual, irrevocable, royalty-free basis to BMJ Publishing Group Ltd ("BMJ") its licensees and where the relevant Journal is co-owned by BMJ to the co-owners of the Journal, to publish the Work in this journal and any other BMJ products and to exploit all rights, as set out in our [licence](#).

The Submitting Author accepts and understands that any supply made under these terms is made by BMJ to the Submitting Author unless you are acting as an employee on behalf of your employer or a postgraduate student of an affiliated institution which is paying any applicable article publishing charge ("APC") for Open Access articles. Where the Submitting Author wishes to make the Work available on an Open Access basis (and intends to pay the relevant APC), the terms of reuse of such Open Access shall be governed by a Creative Commons licence – details of these licences and which [Creative Commons](#) licence will apply to this Work are set out in our licence referred to above.

Other than as permitted in any relevant BMJ Author's Self Archiving Policies, I confirm this Work has not been accepted for publication elsewhere, is not being considered for publication elsewhere and does not duplicate material already published. I confirm all authors consent to publication of this Work and authorise the granting of this licence.

# Agreement between ranking metrics in network meta-analysis: an empirical study

Virginia Chiocchia<sup>1</sup>, Adriani Nikolakopoulou<sup>1</sup>, Theodoros Papakonstantinou<sup>1</sup>, Matthias Egger<sup>1</sup>,  
Georgia Salanti<sup>1</sup>

<sup>1</sup> Institute of Social and Preventive Medicine (ISPM), University of Bern, Bern, Switzerland

Correspondence to:

Virginia Chiocchia, Institute of Social and Preventive Medicine, University of Bern,  
Mittelstrasse 43, CH-3012 Bern, Switzerland.

Email: [virginia.chiocchia@ispm.unibe.ch](mailto:virginia.chiocchia@ispm.unibe.ch)

Abstract 294 words, main text 3262 words, 3 tables, 3 figures, 26 references

1  
2  
3 Keywords: treatment hierarchy, multiple treatments, evidence synthesis, SUCRA, rank  
4 probabilities  
5  
6  
7  
8  
9  
10  
11  
12  
13  
14  
15  
16  
17  
18  
19  
20  
21  
22  
23  
24  
25  
26  
27  
28  
29  
30  
31  
32  
33  
34  
35  
36  
37  
38  
39  
40  
41  
42  
43  
44  
45  
46  
47  
48  
49  
50  
51  
52  
53  
54  
55  
56  
57  
58  
59  
60

For peer review only

## ABSTRACT

### Objective

To empirically explore the level of agreement of the treatment hierarchies from different ranking metrics in network meta-analysis (NMA) and to investigate how network characteristics influence the agreement.

### Design

Empirical evaluation from re-analysis of network meta-analyses.

### Data

232 networks of four or more interventions from randomised controlled trials, published between 1999 and 2015.

### Methods

We calculated treatment hierarchies from several ranking metrics: relative treatment effects, probability of producing the best value ( $p_{BV}$ ) and the surface under the cumulative ranking curve (SUCRA). We estimated the level of agreement between the treatment hierarchies using different measures: Kendall's  $\tau$  and Spearman's  $\rho$  correlation; and the Yilmaz  $\tau_{AP}$  and Average Overlap, to give more weight to the top of the rankings. Finally, we assessed how the amount of the information present in a network affects the agreement between treatment hierarchies, using the average variance, the relative range of variance, and the total sample size over the number of interventions of a network.

## Results

Overall, the pairwise agreement was high for all treatment hierarchies obtained by the different ranking metrics. The highest agreement was observed between SUCRA and the relative treatment effect for both correlation and top-weighted measures whose medians were all equal to one. The agreement between rankings decreased for networks with less precise estimates and the hierarchies obtained from  $p_{BV}$  appeared to be the most sensitive to large differences in the variance estimates. However, such large differences were rare.

## Conclusions

Different ranking metrics address different treatment hierarchy problems, however they produced similar rankings in the published networks. Researchers reporting NMA results can use the ranking metric they prefer, unless there are imprecise estimates or large imbalances in the variance estimates. In this case treatment hierarchies based on both probabilistic and non-probabilistic ranking metrics should be presented.

## STRENGTH AND LIMITATIONS OF THIS STUDY

- To our knowledge, this is the first empirical study exploring the level of agreement of the treatment hierarchies from different ranking metrics in network meta-analysis (NMA).
- The study also explores how agreement is influenced by network characteristics.
- More than 200 published NMAs were re-analysed and three different ranking metrics calculated using both frequentist and Bayesian approaches.
- Other potential factors not investigated in this study could influence the agreement between hierarchies.



## INTRODUCTION

Network meta-analysis (NMA) is being increasingly used by policy makers and clinicians to answer one of the key questions in medical decision-making: “what treatment works best for the given condition?” [1,2]. The relative treatment effects, estimated in NMA, can be used to produce ranking metrics: statistical quantities measuring the performance of an intervention on the studied outcomes, thus producing a treatment hierarchy from the most preferable to the least preferable option [3,4].

Despite the importance of treatment hierarchies in evidence-based decision making, various methodological issues related to the ranking metrics have been contested [5–7]. This ongoing methodological debate focuses on the uncertainty and bias in a single ranking metric. Hierarchies produced by different ranking metrics are not expected to agree because ranking metrics differ. For example, a *non-probabilistic ranking metric* such as the treatment effect against a common comparator considers only the mean effect (e.g. the point estimate of the odds-ratio) and ignores the uncertainty with which this is estimated. In contrast, the probability that a treatment achieves a specific rank (a *probabilistic ranking metric*) considers the entire estimated distribution of each treatment effect. However, it is important to understand why and how rankings based on different metrics differ.

There are network characteristics that are expected to influence the agreement of treatment hierarchies from different ranking metrics, such as the precision of the included studies and their distribution across treatment comparisons [4,8]. Larger imbalances in precision in the estimation of the treatment effects affects the agreement of the treatment hierarchies from probabilistic ranking metrics, but it is currently unknown whether in practice these imbalances occur and whether they should inform the choice between different ranking

1  
2  
3 metrics. To our knowledge, no empirical studies have explored the level of agreement of  
4  
5 treatment hierarchies obtained from different ranking metrics, or examined the network  
6  
7 characteristics likely to influence the level of agreement. Here, we empirically evaluated the  
8  
9 level of agreement between ranking metrics and examined how the agreement is affected by  
10  
11 network features. The article first describes the methods for the calculation of ranking metrics  
12  
13 and of specific measures to assess the agreement and to explore factors that affects it,  
14  
15 respectively. Then, a network featuring one of the explored factors is shown as an illustrative  
16  
17 example to display differences in treatment hierarchies from different ranking metrics.  
18  
19 Finally, we present the results from the empirical evaluation and discuss their implications for  
20  
21 researchers undertaking network meta-analysis.  
22  
23  
24  
25  
26  
27  
28

## 29 METHODS

### 30 Data

31  
32  
33 We re-analysed networks of randomised controlled trials from a database of articles  
34  
35 published between 1999 and 2015, including at least 4 treatments; details about the search  
36  
37 strategy and inclusion/exclusion criteria can be found in [9,10]. We selected networks  
38  
39 reporting arm-level data for binary or continuous outcomes. The database is accessible in the  
40  
41 *nmadb* R package [11].  
42  
43  
44  
45  
46  
47  
48  
49

### 50 Re-analysis and calculation of ranking metrics

51  
52  
53 All networks were re-analysed using the relative treatment effect that the original publication  
54  
55 used: odds ratio (OR), risk ratio (RR), standardised mean difference (SMD) or mean difference  
56  
57 (MD). We estimated relative effects between treatments using a frequentist random-effects  
58  
59  
60

1  
2  
3 NMA model using the *netmeta* R package [12]. For the networks reporting ORs and SMDs we  
4  
5 re-analysed them also using Bayesian models using self-programmed NMA routines in JAGS  
6  
7 (<https://github.com/esm-ispn-unibe-ch/NMAJags>). To obtain probabilistic ranking metrics in  
8  
9 a frequentist setting, we used parametric bootstrap by producing 1000 datasets from the  
10  
11 estimated relative effects and their variance-covariance matrix. By averaging over the number  
12  
13 of simulated relative effects we derived the *probability of treatment  $i$  to produce the best*  
14  
15  
16  
17  
18 *value*

$$p_{i,BV} = p_{i,1} = P(\mu_{ij} > 0 \quad \forall j \in \mathbb{T})$$

19  
20 where  $\mu_{ij}$  is the estimated mean relative effect of treatment  $i$  against treatment  $j$  out of a set  
21  
22  $\mathbb{T}$  of  $T$  competing treatments. We will refer to this as  $p_{BV}$ . This ranking metric indicates how  
23  
24 likely a treatment is to produce the largest values for an outcome (or smallest value, if the  
25  
26 outcome is harmful). We also calculated the surface under the cumulative ranking curve (   
27  
28  $SUCRA^F$ ) [3]

$$SUCRA_i = \frac{\sum_{r=1}^{T-1} c_{i,r}}{T-1}$$

29  
30 where  $c_{i,r} = \sum_{v=1}^r p_{i,v}$  are the cumulative probabilities that treatment  $i$  will produce an  
31  
32 outcome that is among the  $r$  best values (or that it outperforms  $T - r$  treatments). SUCRA,  
33  
34 unlike  $p_{BV}$ , also considers the probability of a treatment to produce unfavourable outcome  
35  
36 values. Therefore, the treatment with the largest SUCRA value represents the one that  
37  
38 outperforms the competing treatments in the network, meaning that overall it produces  
39  
40 preferable outcomes compared to the others. We also obtained SUCRAs within a Bayesian  
41  
42 framework ( $SUCRA^B$ ).

43  
44 To obtain the non-probabilistic ranking metric we fitted an NMA model and estimated related  
45  
46 treatment effects. To obtain estimates for all treatments we reparametrize the NMA model  
47  
48  
49  
50  
51  
52  
53  
54  
55  
56  
57  
58  
59  
60

1  
2  
3 so that each treatment is compared to a fictional treatment of average performance [13,14].  
4  
5 The estimated relative effects against a fictional treatment  $F$  of average efficacy  $\hat{\mu}_{iF}$  represent  
6  
7 the ranking metric and the corresponding hierarchy is obtained simply by ordering the effects  
8  
9 from the largest to the smallest (or in ascending order, if the outcome is harmful). The  
10  
11 resulting hierarchy is identical to that obtained using relative effects from the conventional  
12  
13 NMA model, irrespective of the reference treatment. In the rest of the manuscript, we will  
14  
15 refer to this ranking metric simply as relative treatment effect.  
16  
17  
18  
19  
20

### 21 Agreement between ranking metrics

22  
23  
24 To estimate the level of agreement between the treatment hierarchies obtained using the  
25  
26 three chosen ranking methods we employed several correlation and similarity measures.

27  
28 To assess the correlation between ranking metrics we used Kendall's  $\tau$  [15] and the  
29  
30 Spearman's  $\rho$  [16]. Both Kendall's  $\tau$  and Spearman's  $\rho$  give the same weight to each item in  
31  
32 the ranking. In the context of treatment ranking, the top of the ranking is more important  
33  
34 than the bottom. We therefore also used a top-weighted variant of Kendall's  $\tau$ , Yilmaz  $\tau_{AP}$   
35  
36 [17], which is based on a probabilistic interpretation of the average precision measure used  
37  
38 in information retrieval [18] (see online supplementary Appendix).  
39  
40  
41  
42  
43

44 The measures described so far can only be considered for conjoint rankings, i.e. for lists where  
45  
46 each item in one list is also present in the other list. Rankings are *non-conjoint* when a ranking  
47  
48 is truncated to a certain *depth*  $k$  with such lists called *top-k rankings*. We calculated the  
49  
50 Average Overlap [19,20], a top-weighted measure for top-k rankings that considers the  
51  
52 cumulative intersection (or *overlap*) between the two lists and averages it over a specified  
53  
54 depth (cut-off point)  $k$  (see online supplementary Appendix for details). We calculated the  
55  
56 Average Overlap between pairs of rankings for networks with at least six treatments (139  
57  
58  
59  
60

networks) for a depth  $k$  equal to half the number of treatments in the network,  $k = T/2$  (or  $((T - 1))/2$  if  $T$  is an odd number).

We calculated the four measures described above to assess the pairwise agreement between the three ranking metrics within the frequentist setting and summarised them for each pair of ranking metrics and each agreement measure using the median and the 1<sup>st</sup> and 3<sup>rd</sup> quartiles. The hierarchy according to  $SUCRA^B$  was compared to that of its frequentist equivalent to check how often the two disagree.

### Influence of network features on the rankings agreement

The main network characteristic considered was the amount of information in the network (reflected in the precision of the estimates). Therefore, for each network we calculated the following measures of information:

- the average variance, calculated as the mean of the variances of the estimated treatment effects  $mean(SE^2)$ , to show how much information is present in a network altogether;
- the relative range of variance, calculated as  $\frac{\max SE^2 - \min SE^2}{\max SE^2}$ , to describe differences in information about each intervention within the same networks;
- the total sample size of a network over the number of interventions.

These measures are presented in scatter plots against the agreement measurements for pairs of ranking metrics.

All the codes for the empirical evaluation are available at <https://github.com/esm-isp-unibe-ch/rankingagreement>.

## Patient and public involvement

Patients and the public were not involved in this study.

## ILLUSTRATIVE EXAMPLE

To illustrate the impact of the amount of information on the treatment hierarchies from different ranking metrics, we used a network of nine antihypertensive treatments for primary prevention of cardiovascular disease that presents large differences in the precision of the estimates of overall mortality [21]. The network graph and forest plot of relative treatment effects of each treatment versus placebo are presented in **Figure 1**. The relative treatment effects reported are risk ratios (RR) estimated using a random effects NMA model.

**Table 1** shows the treatment hierarchies obtained using the three ranking metrics described above. The highest overall agreement is between hierarchies from the  $SUCRA^F$  and the relative treatment effect as shown by both correlation (Spearman's  $\rho = 0.93$ , Kendall's  $\tau = 0.87$ ) and top-weighted measures (Yilmaz's  $\tau_{AP} = 0.87$ ; Average Overlap = 0.85). The level of agreement decreases when  $SUCRA^F$  and the relative treatment effect are compared with  $p_{BV}$  rankings (Spearman's  $\rho = 0.63$  and  $\rho = 0.85$  respectively). Agreement with  $p_{BV}$  especially decreases when considering top ranks only (Average Overlap is 0.48 for  $p_{BV}$  versus  $SUCRA^F$  and 0.54 for  $p_{BV}$  versus relative treatment effect). All agreement measures are presented in online supplementary **Table S1**.

The reason for this disagreement is explained by the differences in precision in the estimated effects (**Figure 1**). These RRs versus placebo range from 0.82 (Diuretic/Beta-blocker versus placebo) to 0.98 (Beta-blocker versus placebo). All estimates are fairly precise except for the RR of conventional therapy versus placebo whose 95% confidence interval extends from 0.21

1  
2  
3 to 3.44. This uncertainty in the estimation is due to the fact that conventional therapy is  
4 compared only with Angiotensin Receptor Blockers (ARB) via a single study. This large  
5 difference in the precision of the estimation of the treatment effects mostly affects the  $p_{BV}$   
6 ranking, which disagrees the most with both of the other rankings. Consequently, the  
7 Conventional therapy is in the first rank in the  $p_{BV}$  hierarchy (because of the large uncertainty)  
8 but only features in the third/fourth and sixth rank using the relative treatment effects and  
9  $SUCRA^F$  hierarchies, respectively.  
10  
11  
12  
13  
14  
15  
16  
17  
18  
19

20  
21 *To explore how the hierarchies for this network would change in case of increased precision, we reduced the*  
22 *standard error of the Conventional versus ARB treatment effect from the original 0.7 to a fictional value of 0.01*  
23 *resulting in a confidence interval 0.77 to 0.96. The columns in the right-hand side of **Table 2: Characteristics of***  
24 *the 232 NMAs included in the re-analysis. display the three equivalent rankings after the standard error*  
25 *reduction. The conventional treatment has moved up in the hierarchy according to  $SUCRA^F$  and moved down in*  
26 *the one based on  $p_{BV}$ , as expected. The treatment hierarchies obtained from the  $SUCRA^F$  and the relative*  
27 *treatment effect are now identical (Conventional and ARB share the 3.5 rank because they have the same effect*  
28 *estimate) and the agreement with the  $p_{BV}$  rankings also improved ( $p_{BV}$  versus  $SUCRA^F$  Spearman's  $\rho = 0.89$ ,*  
29 *Average Overlap = 0.85;  $p_{BV}$  versus relative treatment effect Spearman's  $\rho = 0.91$ , Average Overlap = 0.94; online*  
30 *supplementary **Table S1**).*  
31

## 32 RESULTS

33  
34  
35  
36 A total of 232 networks were included in our dataset. Their characteristics are shown in **Table**  
37  
38  
39 **2**. The majority of networks (133 NMAs, 57.3%) did not report any ranking metrics in the  
40 original publication. Among those which used a ranking metric to produce a treatment  
41 hierarchy, the probability of being the best was the most popular metric followed by the  
42 SUCRA with 35.8% and 6.9% of networks reporting them, respectively.  
43  
44  
45  
46  
47

48  
49 **Table 3** presents the medians and quartiles for each similarity measures. All hierarchies  
50 showed a high level of pairwise agreement, although the hierarchies obtained from the  
51  $SUCRA^F$  and the relative treatment effect presented the highest values for both unweighted  
52 and with top-weighted measures (all measures' median equals 1). Only 4 networks (less than  
53 2%) had a Spearman's correlation between  $SUCRA^F$  and the relative treatment effect less  
54  
55  
56  
57  
58  
59  
60

1  
2  
3 than 90% (not reported). The correlation becomes less between the  $p_{BV}$  rankings and those  
4  
5 obtained from the other two ranking metrics with Spearman's  $\rho$  median decreasing to 0.9  
6  
7 and Kendall's  $\tau$  decreasing to 0.8. The Spearman's correlation between these rankings was  
8  
9 less than 90% in about 50% of the networks (in 116 and 111 networks for  $p_{BV}$  versus  $SUCRA^F$   
10  
11 and  $p_{BV}$  versus relative effect, respectively; results not reported). The pairwise agreement  
12  
13 between the  $p_{BV}$  rankings and the other rankings also decreased when considering only top  
14  
15 ranks ( $p_{BV}$  versus  $SUCRA^F$  Yilmaz's  $\tau_{AP} = 0.77$ , Average Overlap = 0.83;  $p_{BV}$  versus relative  
16  
17 treatment effect Yilmaz's  $\tau_{AP} = 0.79$ , Average Overlap = 0.88).

18  
19  
20  
21  
22  
23 *The SUCRAs from frequentist and Bayesian settings ( $SUCRA^F$  and  $SUCRA^B$ ) were compared in 126 networks (82*  
24 *networks using the Average Overlap measure) as these reported OR and SMD as original measures. The relevant*  
25 *rankings do not differ much as shown by the median values of the agreement measures all equal to 1 and their*  
26 *narrow interquartile ranges (Medians, 1<sup>st</sup> and 3<sup>rd</sup> quartiles are reported.  $p_{BV}$ : probability of producing the best*  
27 *value;  $SUCRA^F$ : surface under the cumulative ranking curve (calculated in frequentist setting);  $SUCRA^B$ : surface*  
28 *under the cumulative ranking curve (calculated in Bayesian setting); relative treatment effect stands for the*  
29 *relative treatment effect against fictional treatment of average performance.*

30  
31 ). Nevertheless, a few networks showed a much lower agreement between the two SUCRAs.  
32  
33 These networks provide posterior effect estimates for which the Normal approximation is not  
34  
35 optimal, some of which due to rare outcomes. Such cases were however uncommon as in  
36  
37 only 6% of the networks the Spearman's correlation between  $SUCRA^F$  and  $SUCRA^B$  was less  
38  
39 than 90%. Plots for the Normal distributions from the frequentist setting and the posterior  
40  
41 distributions of the log odds-ratios (LOR) for a network with a Spearman's  $\rho$  of 0.6 between  
42  
43 the two SUCRAs is available in online supplementary **Figure S1** [22].

44  
45  
46  
47  
48 **Figure 2** presents how Spearman's  $\rho$  and the Average Overlap vary with the average variance  
49  
50 of the relative treatment effect estimates in a network (scatter plots for the Kendall's  $\tau$  and  
51  
52 the Yilmaz's  $\tau_{AP}$  are available in online supplementary **Figure S2**). The treatment hierarchies  
53  
54 agree more in networks with more precise estimates (left hand side of the plots).  
55  
56  
57  
58  
59  
60



1  
2  
3 The association between Spearman's  $\rho$  or Average Overlap and the relative range of variance  
4 in a network (here transformed to a double logarithm of the inverse values) are displayed in  
5  
6  
7  
8 **Figure 3**. On the right-hand side of each plot we can find networks with smaller differences in  
9 the precision of the treatment effect estimates. Treatment hierarchies for these networks  
10 show a larger agreement than for those with larger differences in precision. The plots of the  
11 impact of the relative range of variance on all measures are available in online supplementary  
12  
13  
14  
15  
16  
17  
18 **Figure S3**.

19  
20 The total sample size in a network over the number of interventions has a similar impact on  
21 the level of agreement between hierarchies. This confirms that the agreement between  
22 hierarchies increases for networks with a large total sample size compared to the number of  
23 treatments and, more generally, it increases with the amount of information present in a  
24 network (online supplementary **Figure S4**).

## DISCUSSION

33  
34  
35  
36  
37  
38 Our empirical evaluation showed that in practice the level of agreement between treatment  
39 hierarchies is overall high for all ranking metrics used. The agreement between treatment  
40 hierarchies from *SUCRA* and relative treatment effect was very often perfect. The agreement  
41 between the rankings from *SUCRA* or relative treatment effect and the ranking from  $p_{BV}$  was  
42 good but decreased when the top-ranked interventions are of interest. The agreement is  
43 higher for networks with precise estimates and small imbalances in precision.

44  
45  
46  
47  
48  
49  
50  
51  
52  
53 Simulation studies [6,23] using theoretical examples have shown the importance of  
54 accounting for the precision in the estimation of the treatment effects when a hierarchy is to

1  
2  
3 be obtained. However, we show that cases of extreme imbalance in the precision of the  
4  
5 treatment effects are rather uncommon.  
6  
7

8 Several factors can be responsible for imprecision in the estimation of the relative treatment  
9  
10 effects in a network:  
11

- 12  
13 • large sampling error, determined by a small sample size, small number of events or a  
14  
15 large standard deviation;  
16
- 17  
18 • poor connectivity of the network, when only a few links and few closed loops of evidence  
19  
20 connect the treatments;  
21  
22
- 23  
24 • residual inconsistency;  
25
- 26  
27 • heterogeneity in the relative treatment effects.  
28

29 Random-effects models tend to provide relative treatment effects with similar precision as  
30  
31 heterogeneity increases. In contrast, in the absence of heterogeneity when fixed-effects  
32  
33 models are used, the precision of the effects can vary a lot according to the amount of data  
34  
35 available for each intervention. In the latter case, the ranking metrics are likely to disagree.  
36  
37 Also, the role of precision in ranking disagreement is more pronounced in cases where the  
38  
39 interventions have similar effects.  
40

41  
42 Our results also confirm that a treatment hierarchy can differ when the uncertainty in the  
43  
44 estimation is incorporated into the ranking metric (by using, for example, a probabilistic  
45  
46 metric rather than ranking the point estimate of the mean treatment effect) [8,24] and that  
47  
48 rankings from the  $p_{BV}$  seem to be the most sensitive to differences in precision in the  
49  
50 estimation of treatment effects. We showed graphically that the agreement is less in  
51  
52 networks with more uncertainty and with larger imbalances in the variance estimates.  
53  
54 However, we also found that such large imbalances do not occur frequently in real data and  
55  
56 in the majority of cases the different treatment hierarchies have a relatively high agreement.  
57  
58  
59  
60

1  
2  
3 We acknowledge that there could be other factors influencing the agreement between  
4 hierarchies that we did not explore, such as the chosen effect measures [25]. However, we  
5 think it is unlikely that such features play a big role in ranking agreement unless assumptions  
6 are violated or data in the network is sparse [26]. Adjustment via network meta-regression  
7 (for example, for risk of bias or small-study effects) might impact on the ranking of treatments  
8 not only by changing the point estimate but also by altering the total precision and the  
9 imbalance in the precision of the estimated treatment effects. We did not investigate the  
10 agreement between treatment hierarchies obtained from such adjusted analyses. We also  
11 did not explore non-methodological characteristics for networks with larger disagreement  
12 but we believe these characteristics are a proxy for the amount of information in a network,  
13 which is the main factor affecting the agreement between ranking metrics. For example, in  
14 some specific fields there are few or small randomised trials (e.g. surgery) and, as a  
15 consequence, the resulting networks will have less information. Also, smaller (hence more  
16 imprecise) networks might be published more often in journal with lower impact factor and  
17 get less citations than large and precise networks.

18  
19 To our knowledge, this is the first empirical study assessing the level of agreement between  
20 treatment hierarchies from ranking metrics in NMA and it provides further insights into the  
21 properties of the different methods. In this context, it is important to stress that neither the  
22 objective nor the findings of this empirical evaluation imply that a hierarchy for a particular  
23 metric works better or is more accurate than one obtained from another ranking metric. The  
24 reason why this sort of comparison cannot be made is that each ranking metric address a  
25 specific treatment hierarchy problem. For example, the *SUCRA* ranking addresses the issue  
26 of which treatment outperforms most of the competing interventions, while the ranking  
27  
28  
29  
30  
31  
32  
33  
34  
35  
36  
37  
38  
39  
40  
41  
42  
43  
44  
45  
46  
47  
48  
49  
50  
51  
52  
53  
54  
55  
56  
57  
58  
59  
60

1  
2  
3 based on the relative treatment effect gives an answer to the problem of which treatment is  
4 associated with the largest average effect for the outcome considered.  
5  
6

7  
8 Our study shows that, despite theoretical differences between ranking metrics and some  
9 extreme examples, they produce very similar treatment hierarchies in published networks. In  
10 networks with large amount of data for each treatment, hierarchies based on SUCRA or the  
11 relative treatment effect will almost always agree. Large imbalances in the precision of the  
12 treatment effect estimates do not occur often enough to motivate a choice between the  
13 different ranking metrics. Therefore, our advice to researchers presenting results from NMA  
14 is the following: *if the NMA estimated effects are precise*, to use the ranking metric they  
15 prefer; *if at least one NMA estimated effect is imprecise*, to refrain from making bold  
16 statements about treatment hierarchy and present hierarchies from both probabilistic (e.g.  
17 SUCRA or rank probabilities) and non-probabilistic metrics (e.g. relative treatments effects).  
18  
19  
20  
21  
22  
23  
24  
25  
26  
27  
28  
29  
30  
31  
32

### 33 Author contributions

34  
35  
36 VC designed the study, analysed the data, interpreted the results of the empirical evaluation,  
37 and drafted the manuscript. GS designed the study, interpreted the results of the empirical  
38 evaluation and revised the manuscript. AN provided input into the study design and the data  
39 analysis, interpreted the results of the empirical evaluation and revised the manuscript. TP  
40 developed and manages the database where networks' data was accessed, provided input  
41 into the data analysis and revised the manuscript. ME provided input into the study design  
42 and revised the manuscript. All the authors approved the final version of the submitted  
43 manuscript.  
44  
45  
46  
47  
48  
49  
50  
51  
52  
53  
54  
55  
56  
57  
58  
59  
60

## Funding

This work was supported by the Swiss National Science Foundation grant/award number 179158.

## Competing Interests

All authors have completed the ICMJE uniform disclosure form and declare: all authors had financial support from the Swiss National Science Foundation for the submitted work; no financial relationships with any organizations that might have an interest in the submitted work in the previous three years; no other relationships or activities that could appear to have influenced the submitted work.

## Data sharing statement

The data for the network meta-analyses included in this study are available in the database accessible using the *nmadb* R package.

## Statement of Ethics Approval

Ethical approval was not required as human participants were not involved in this study.

## References

- 1 Efthimiou O, Debray TPA, van Valkenhoef G, *et al.* GetReal in network meta-analysis: a review of the methodology: reviewNMA. *Res Synth Methods* 2016;**7**:236–63. doi:10.1002/jrsm.1195
- 2 Del Fiol G, Workman TE, Gorman PN. Clinical questions raised by clinicians at the point of care: a systematic review. *JAMA Intern Med* 2014;**174**:710–8. doi:10.1001/jamainternmed.2014.368
- 3 Salanti G, Ades AE, Ioannidis JPA. Graphical methods and numerical summaries for presenting results from multiple-treatment meta-analysis: an overview and tutorial. *J Clin Epidemiol* 2011;**64**:163–71. doi:10.1016/j.jclinepi.2010.03.016
- 4 Rücker G, Schwarzer G. Ranking treatments in frequentist network meta-analysis works without resampling methods. *BMC Med Res Methodol* 2015;**15**:58. doi:10.1186/s12874-015-0060-8
- 5 Trinquart L, Attiche N, Bafeta A, *et al.* Uncertainty in Treatment Rankings: Reanalysis of Network Meta-analyses of Randomized Trials. *Ann Intern Med* 2016;**164**:666–73. doi:10.7326/M15-2521
- 6 Kibret T, Richer D, Beyene J. Bias in identification of the best treatment in a Bayesian network meta-analysis for binary outcome: a simulation study. *Clin Epidemiol* 2014;**6**:451–60. doi:10.2147/CLEP.S69660
- 7 Veroniki AA, Straus SE, Rücker G, *et al.* Is providing uncertainty intervals in treatment ranking helpful in a network meta-analysis? *J Clin Epidemiol* 2018;**100**:122–9. doi:10.1016/j.jclinepi.2018.02.009
- 8 Jansen JP, Trikalinos T, Cappelleri JC, *et al.* Indirect Treatment Comparison/Network Meta-Analysis Study Questionnaire to Assess Relevance and Credibility to Inform Health Care Decision Making: An ISPOR-AMCP-NPC Good Practice Task Force Report. *Value Health* 2014;**17**:157–73. doi:10.1016/j.jval.2014.01.004
- 9 Petropoulou M, Nikolakopoulou A, Veroniki A-A, *et al.* Bibliographic study showed improving statistical methodology of network meta-analyses published between 1999 and 2015. *J Clin Epidemiol* 2017;**82**:20–8. doi:10.1016/j.jclinepi.2016.11.002
- 10 Nikolakopoulou A, Chaimani A, Veroniki AA, *et al.* Characteristics of networks of interventions: a description of a database of 186 published networks. *PLoS One* 2014;**9**:e86754. doi:10.1371/journal.pone.0086754
- 11 Papakonstantinou T. *nmaDb: Network Meta-Analysis Database API*. 2019. <https://CRAN.R-project.org/package=nmaDb>
- 12 Rücker G, Krahn U, König J, *et al.* *netmeta: Network Meta-Analysis using Frequentist Methods*. 2019. <https://github.com/guido-s/netmeta> <http://meta-analysis-with-r.org>.
- 13 Hosmer DW, Lemeshow S. *Applied Logistic Regression: Hosmer/Applied Logistic Regression*. Hoboken, NJ, USA: : John Wiley & Sons, Inc. 2000. doi:10.1002/0471722146
- 14 Nikolakopoulou A, Mavridis D, Chiocchia V, *et al.* PreTA: A network meta-analysis ranking metric measuring the probability of being preferable than the average treatment. *Res Synth Methods* (submitted).
- 15 Kendall MG. THE TREATMENT OF TIES IN RANKING PROBLEMS. *Biometrika* 1945;**33**:239–51. doi:10.1093/biomet/33.3.239
- 16 Spearman C. The Proof and Measurement of Association between Two Things. *Am J Psychol* 1904;**15**:72. doi:10.2307/1412159

- 1  
2  
3 17 Yilmaz E, Aslam JA, Robertson S. A new rank correlation coefficient for information retrieval. In: *Proceedings of the 31st annual international ACM SIGIR conference on Research and development in information retrieval - SIGIR '08*. Singapore, Singapore: : ACM Press 2008. 587. doi:10.1145/1390334.1390435
- 4  
5  
6  
7 18 Yilmaz E, Aslam JA. Estimating Average Precision with Incomplete and Imperfect Judgments. In: *Proceedings of the 15th ACM International Conference on Information and Knowledge Management*. New York, NY, USA: : ACM 2006. 102–111. doi:10.1145/1183614.1183633
- 8  
9  
10  
11 19 Fagin R, Kumar R, Sivakumar D. Comparing Top K Lists. In: *Proceedings of the Fourteenth Annual ACM-SIAM Symposium on Discrete Algorithms*. Philadelphia, PA, USA: : Society for Industrial and Applied Mathematics 2003. 28–36. <http://dl.acm.org/citation.cfm?id=644108.644113> (accessed 15 May 2019).
- 12  
13  
14  
15 20 Wu S, Crestani F. Methods for Ranking Information Retrieval Systems Without Relevance Judgments. In: *Proceedings of the 2003 ACM Symposium on Applied Computing*. New York, NY, USA: : ACM 2003. 811–816. doi:10.1145/952532.952693
- 16  
17  
18  
19 21 Fretheim A, Odgaard-Jensen J, Brørs O, *et al*. Comparative effectiveness of antihypertensive medication for primary prevention of cardiovascular disease: systematic review and multiple treatments meta-analysis. *BMC Med* 2012;**10**:33. doi:10.1186/1741-7015-10-33
- 20  
21  
22  
23 22 Greco T, Calabrò MG, Covello RD, *et al*. A Bayesian network meta-analysis on the effect of inodilatory agents on mortality. *Br J Anaesth* 2015;**114**:746–56. doi:10.1093/bja/aeu446
- 24  
25  
26 23 Davies AL, Galla T. Degree irregularity and rank probability bias in network meta-analysis. *ArXiv200307662 Cond-Mat Stat* Published Online First: 17 March 2020. <http://arxiv.org/abs/2003.07662> (accessed 24 Jun 2020).
- 27  
28  
29  
30 24 Chaimani A, Vasiliadis HS, Pandis N, *et al*. Effects of study precision and risk of bias in networks of interventions: a network meta-epidemiological study. *Int J Epidemiol* 2013;**42**:1120–31. doi:10.1093/ije/dyt074
- 31  
32  
33  
34 25 Norton EC, Miller MM, Wang JJ, *et al*. Rank Reversal in Indirect Comparisons. *Value Health* 2012;**15**:1137–40. doi:10.1016/j.jval.2012.06.001
- 35  
36  
37 26 van Valkenhoef G, Ades AE. Evidence Synthesis Assumes Additivity on the Scale of Measurement: Response to “Rank Reversal in Indirect Comparisons” by Norton *et al*. *Value Health* 2013;**16**:449–51. doi:10.1016/j.jval.2012.11.012
- 38  
39  
40  
41  
42  
43  
44  
45  
46  
47  
48  
49  
50  
51  
52  
53  
54  
55  
56  
57  
58  
59  
60

**Table 1: Example of treatment hierarchies from different ranking metrics for a network of nine antihypertensive treatment for primary prevention of cardiovascular disease.**

| Treatment             | Original data  |                 |                                 | Fictional data with increased precision for Conventional treatment versus ARB |                 |                                 |
|-----------------------|----------------|-----------------|---------------------------------|-------------------------------------------------------------------------------|-----------------|---------------------------------|
|                       | $p_{BV}$ ranks | $SUCRA_F$ ranks | Relative treatment effect ranks | $p_{BV}$ ranks                                                                | $SUCRA_F$ ranks | Relative treatment effect ranks |
| Conventional          | 1              | 6               | 3.5                             | 3                                                                             | 4               | 3.5                             |
| Diuretic/Beta-blocker | 2              | 1               | 1                               | 1                                                                             | 1               | 1                               |
| ARB                   | 3              | 3               | 3.5                             | 4.5                                                                           | 3               | 3.5                             |
| CCB                   | 4              | 2               | 2                               | 2                                                                             | 2               | 2                               |
| Alpha-blocker         | 5              | 7               | 7                               | 4.5                                                                           | 7               | 7                               |
| ACE-inhibitor         | 6              | 4               | 5                               | 6.5                                                                           | 5               | 5                               |
| Diuretic              | 7              | 5               | 6                               | 6.5                                                                           | 6               | 6                               |
| Placebo               | 8.5            | 9               | 9                               | 8.5                                                                           | 9               | 9                               |
| Beta-Blocker          | 8.5            | 8               | 8                               | 8.5                                                                           | 8               | 8                               |

ACE=Angiotensin Converting Enzyme; CCB=Calcium Channel Blockers; ARB=Angiotensin Receptor Blockers.  $p_{BV}$ : probability of producing the best value;  $SUCRA_F$ : surface under the cumulative ranking curve (calculated in frequentist setting); relative treatment effect stands for the relative treatment effect against fictional treatment of average performance. The first three rankings from the left-hand side are obtained using the original data; the equivalent three rankings on the right-hand side are produced by reducing the standard error of the Conventional versus ARB treatment effect from 0.7 to a fictional value of 0.01.

**Table 2: Characteristics of the 232 NMAs included in the re-analysis.**

| Characteristics of networks                                  | Median         | IQR           |
|--------------------------------------------------------------|----------------|---------------|
| Median number of treatments compared                         | 6              | (5, 9)        |
| Median number of studies included                            | 19             | (12, 34)      |
| Median total sample size                                     | 6100           | (2514, 17264) |
|                                                              | Number of NMAs | %             |
| Beneficial outcome                                           | 97             | 41.8%         |
| Dichotomous outcome                                          | 185            | 79.7%         |
| Continuous outcome                                           | 47             | 20.3%         |
| Published before 2010                                        | 42             | 18.1%         |
| Ranking metric used in original publication (non-exclusive): |                |               |
| Probability of producing the best value                      | 83             | 35.8%         |
| Rankograms                                                   | 7              | 3%            |
| Median or mean rank                                          | 3              | 1.3%          |
| SUCRA                                                        | 16             | 6.9%          |
| Other                                                        | 2              | 0.9%          |
| None                                                         | 133            | 57.3%         |



|                                                 |     |       |
|-------------------------------------------------|-----|-------|
| Published in general medicine journals†         | 125 | 53.9% |
| Published in health services research journals‡ | 3   | 1.3%  |
| Published in specialty journals                 | 104 | 44.8% |

IQR: interquartile range; NMA: network meta-analysis; SUCRA: surface under the cumulative ranking curve.

† Includes the categories Medicine, General & Internal, Pharmacology & Pharmacy, Research & Experimental, Primary Health Care.

‡ Includes the categories Health Care Sciences & Services, Health Policy & Services.

**Table 3: Pairwise agreement between treatment hierarchies obtained from the different ranking metrics measured by Spearman  $\rho$ , Kendall  $\tau$ , Yilmaz  $\tau_{AP}$  and Average Overlap.**

|                                      | $p_{BV}$ vs $SUCRA_F$ | $SUCRA_F$ vs relative treatment effect | $p_{BV}$ vs relative treatment effect | $SUCRA_F$ vs $SUCRA_B$ |
|--------------------------------------|-----------------------|----------------------------------------|---------------------------------------|------------------------|
| <b>Spearman <math>\rho</math></b>    | 0.9 (0.8, 0.96)       | 1 (0.99, 1)                            | 0.9 (0.8, 0.97)                       | 1 (0.98, 1)            |
| <b>Kendall <math>\tau</math></b>     | 0.8 (0.67, 0.91)      | 1 (0.95, 1)                            | 0.8 (0.69, 0.91)                      | 1 (0.93, 1)            |
| <b>Yilmaz <math>\tau_{AP}</math></b> | 0.78 (0.6, 0.9)       | 1 (0.93, 1)                            | 0.79 (0.65, 0.9)                      | 1 (0.93, 1)            |
| <b>Average Overlap</b>               | 0.85 (0.72, 0.96)     | 1 (0.91, 1)                            | 0.88 (0.79, 1)                        | 1 (0.94, 1)            |

Medians, 1<sup>st</sup> and 3<sup>rd</sup> quartiles are reported.  $p_{BV}$ : probability of producing the best value;  $SUCRA_F$ : surface under the cumulative ranking curve (calculated in frequentist setting);  $SUCRA_B$ : surface under the cumulative ranking curve (calculated in Bayesian setting); relative treatment effect stands for the relative treatment effect against fictional treatment of average performance.

**Figure 1: (left panel) Network graph of network of nine antihypertensive treatments for primary prevention of cardiovascular disease.** Line width is proportional to inverse standard error of random effects model comparing two treatments. **(right panel) Forest plots of relative treatment effects of overall mortality for each treatment versus placebo.** RR: risk ratio; ACE=Angiotensin Converting Enzyme; CCB=Calcium Channel Blockers; ARB=Angiotensin Receptor Blockers; SE=standard error.

**Figure 2: Scatter plots of the average variance in a network and the pairwise agreement between hierarchies from different ranking metrics.** The average variance is calculated as the mean of the variances of the estimated treatment effects and describes the average information present in a network. More imprecise network are on the right-hand side of the plots. Spearman  $\rho$  (top row) and Average Overlap (bottom row) values for the pairwise agreement between  $p_{BV}$  and  $SUCRA$  (first column),  $SUCRA$  and relative treatment effect (second column),  $p_{BV}$  and relative treatment effect (third column). Purple line: cubic smoothing spline with five degrees of freedom.

**Figure 3: Scatter plots of the relative range of variance in a network and the pairwise agreement between hierarchies from different ranking metrics.** The relative range of variance, calculated as  $\frac{\max SE^2 - \min SE^2}{\max SE^2}$ , indicates how much the information differs between interventions in the same networks. Networks with larger differences in variance are on the left-hand side of the plots. Spearman  $\rho$  (top row) and Average Overlap (bottom row) values for the pairwise agreement between  $p_{BV}$  and  $SUCRA$  (first column),  $SUCRA$  and relative treatment effect (second column),  $p_{BV}$  and relative treatment effect (third column). Purple line: cubic smoothing spline with five degrees of freedom.

1  
2  
3  
4  
5  
6  
7  
8  
9  
10  
11  
12  
13  
14  
15  
16  
17  
18  
19  
20  
21  
22  
23  
24  
25  
26  
27  
28  
29  
30  
31  
32  
33  
34  
35  
36  
37  
38  
39  
40  
41  
42  
43  
44  
45  
46  
47  
48  
49  
50  
51  
52  
53  
54  
55  
56  
57  
58  
59  
60

For peer review only

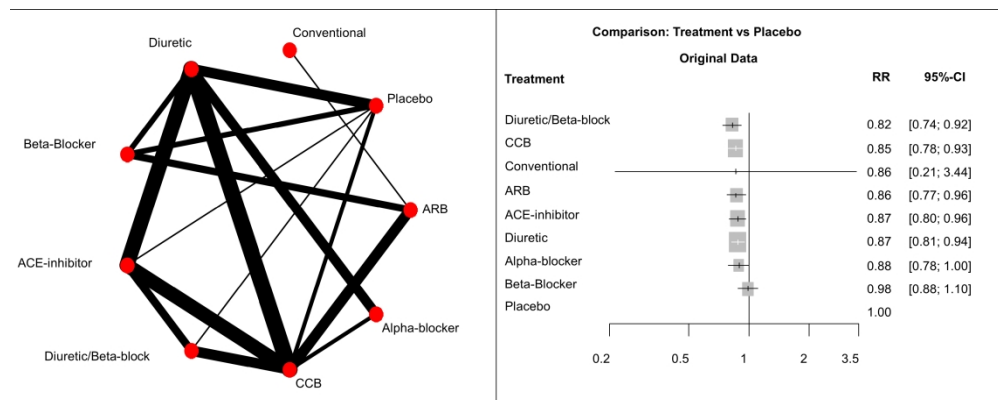

**Figure 1: (left panel) Network graph of network of nine antihypertensive treatments for primary prevention of cardiovascular disease.** Line width is proportional to inverse standard error of random effects model comparing two treatments. **(right panel) Forest plots of relative treatment effects of overall mortality for each treatment versus placebo.** RR: risk ratio; ACE=Angiotensin Converting Enzyme; CCB=Calcium Channel Blockers; ARB=Angiotensin Receptor Blockers; SE=standard error.

338x134mm (300 x 300 DPI)

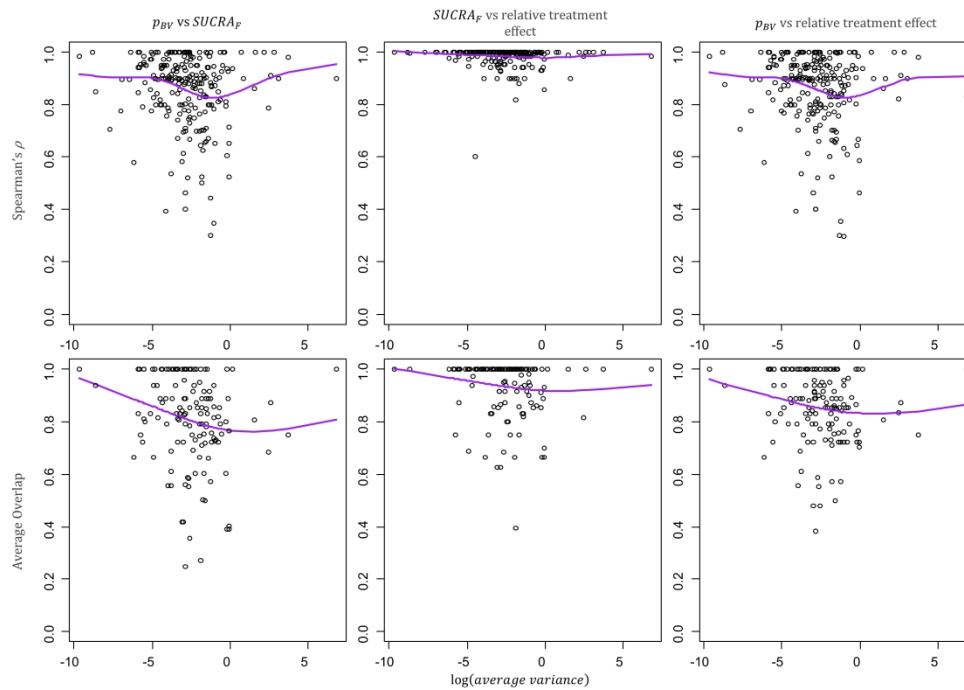

**Figure 2: Scatter plots of the average variance in a network and the pairwise agreement between hierarchies from different ranking metrics.** The average variance is calculated as the mean of the variances of the estimated treatment effects and describes the average information present in a network. More imprecise networks are on the right-hand side of the plots. Spearman  $\rho$  (top row) and Average Overlap (bottom row) values for the pairwise agreement between  $p_{BV}$  and SUCRA (first column), SUCRA and relative treatment effect (second column),  $p_{BV}$  and relative treatment effect (third column). Purple line: cubic smoothing spline with five degrees of freedom.

270x190mm (300 x 300 DPI)

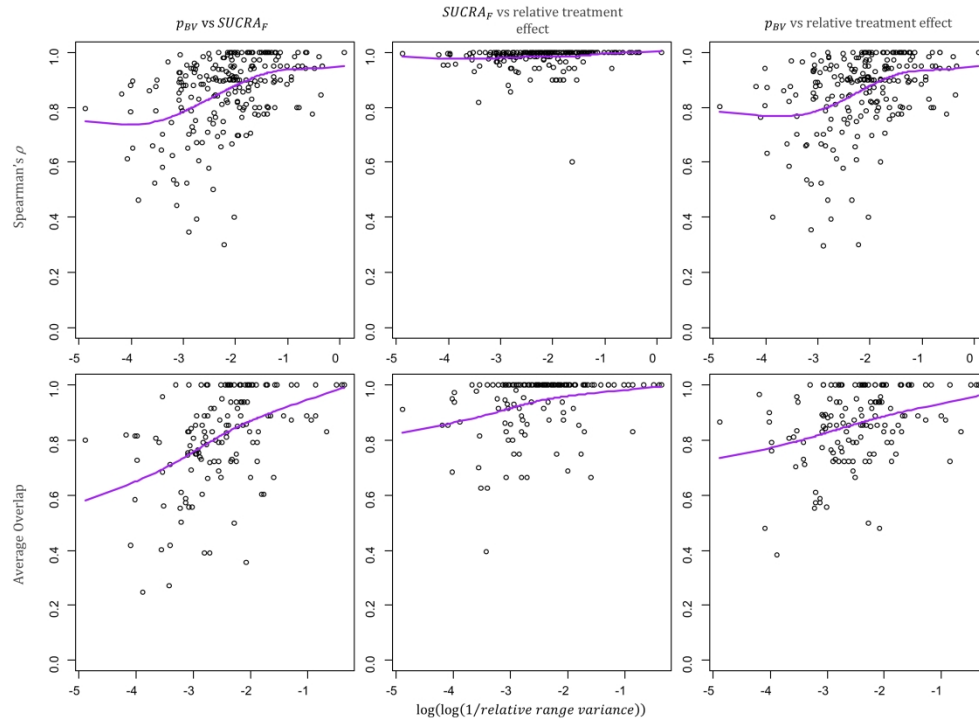

**Figure 3: Scatter plots of the relative range of variance in a network and the pairwise agreement between hierarchies from different ranking metrics.** The relative range of variance, calculated as  $(\max(SE^2) - \min(SE^2)) / \max(SE^2)$ , indicates how much the information differs between interventions in the same networks. Networks with larger differences in variance are on the left-hand side of the plots. Spearman  $\rho$  (top row) and Average Overlap (bottom row) values for the pairwise agreement between  $p_{BV}$  and SUCRA (first column), SUCRA and relative treatment effect (second column),  $p_{BV}$  and relative treatment effect (third column). Purple line: cubic smoothing spline with five degrees of freedom.

261x190mm (300 x 300 DPI)

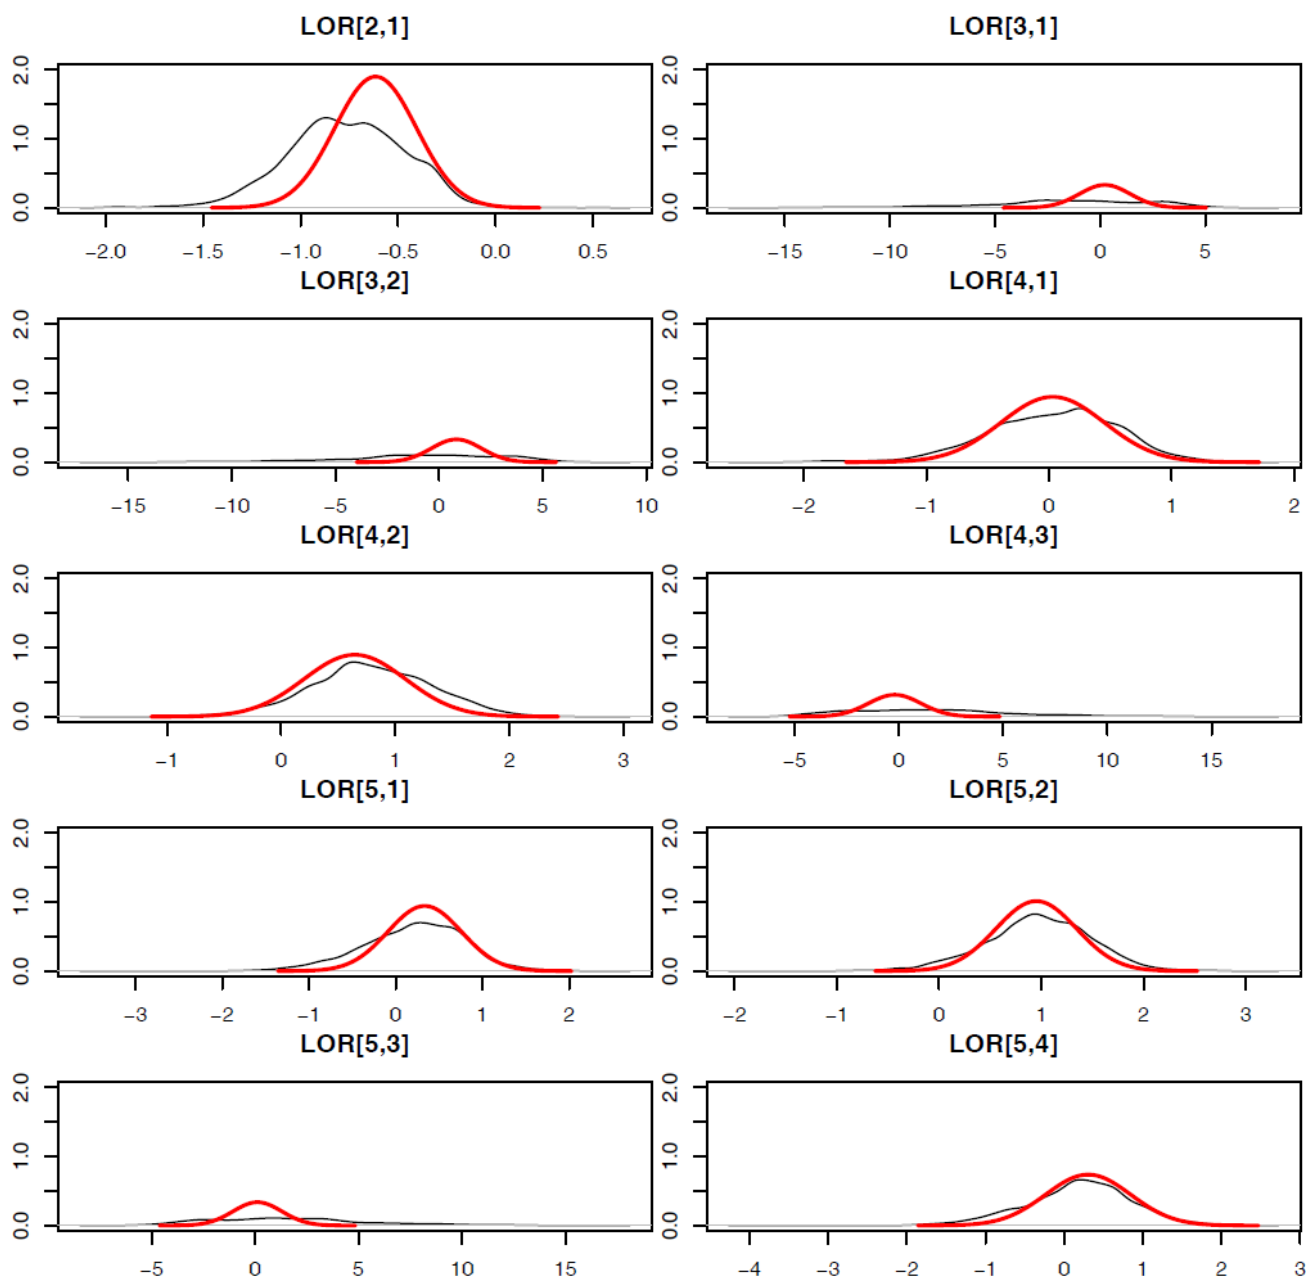

Figure S1: Normal distributions of relative treatment effect estimates from frequentist setting (red line) superimposed on posterior distributions of the relative treatment effects from Bayesian model (black line) for a network with Spearman's  $\rho$  of 0.6 between  $SUCRA_F$  and  $SUCRA_B$ . The network meta-analysis used analysed the effects of four inodilators and placebo on survival in adult cardiac surgery patients (Greco et al., *Br J Anaesth* 2015). LOR = log odds ratios; number in square brackets represents the different interventions in the network.

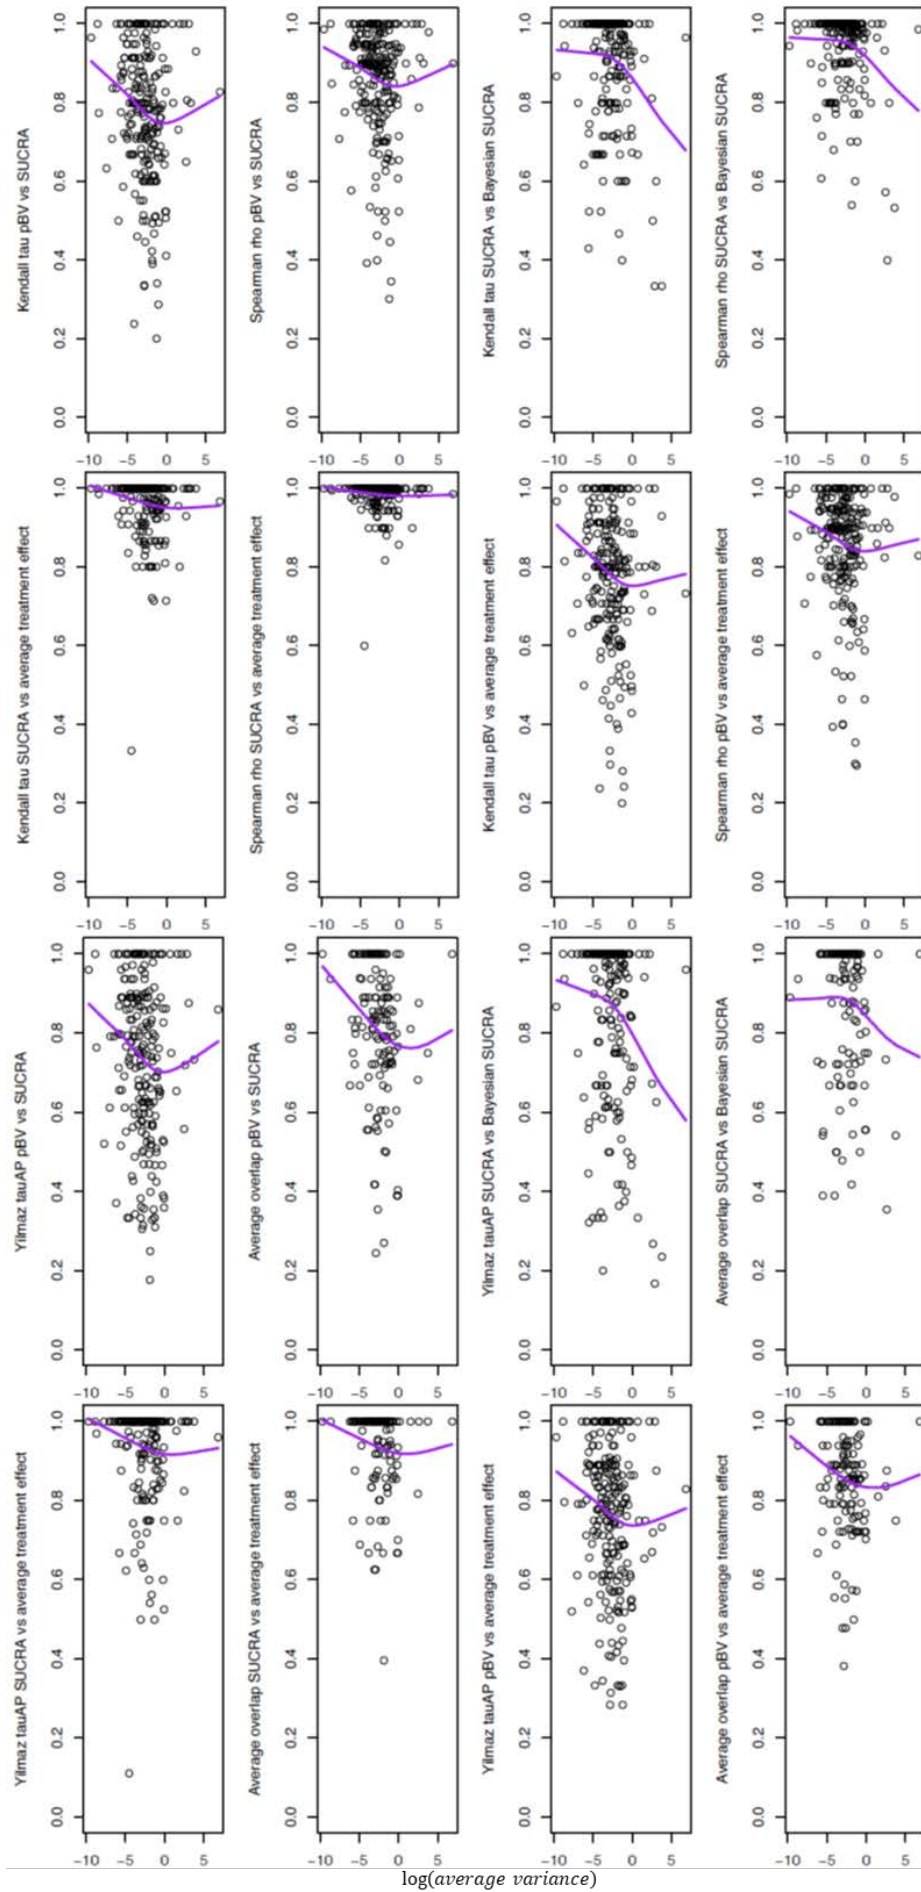

Figure S2: Scatter plots of the average variance in a network and the pairwise agreement between hierarchies from different ranking metrics.



1  
2  
3  
4  
5  
6  
7  
8  
9  
10  
11  
12  
13  
14  
15  
16  
17  
18  
19  
20  
21  
22  
23  
24  
25  
26  
27  
28  
29  
30  
31  
32  
33  
34  
35  
36  
37  
38  
39  
40  
41  
42  
43  
44  
45  
46  
47  
48  
49  
50  
51  
52  
53  
54  
55  
56  
57  
58  
59  
60

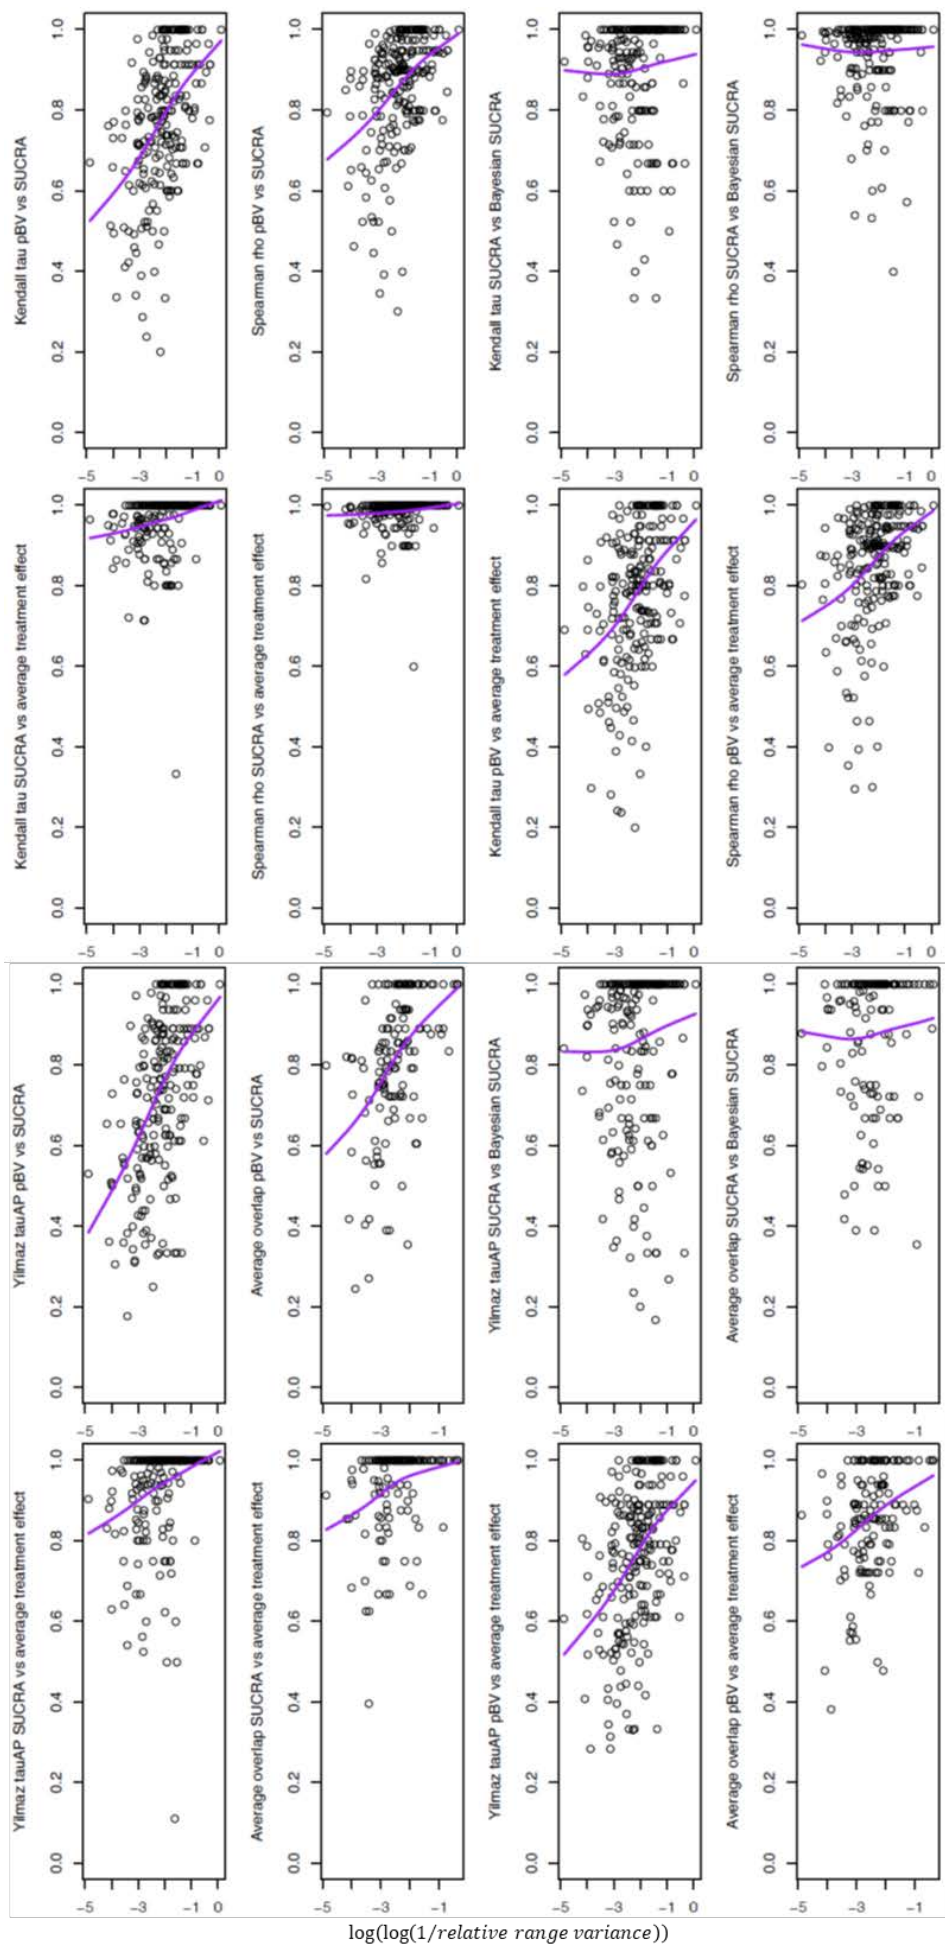

Figure S3: Scatter plots of the relative range of variance in a network and the pairwise agreement between hierarchies from different ranking metrics.



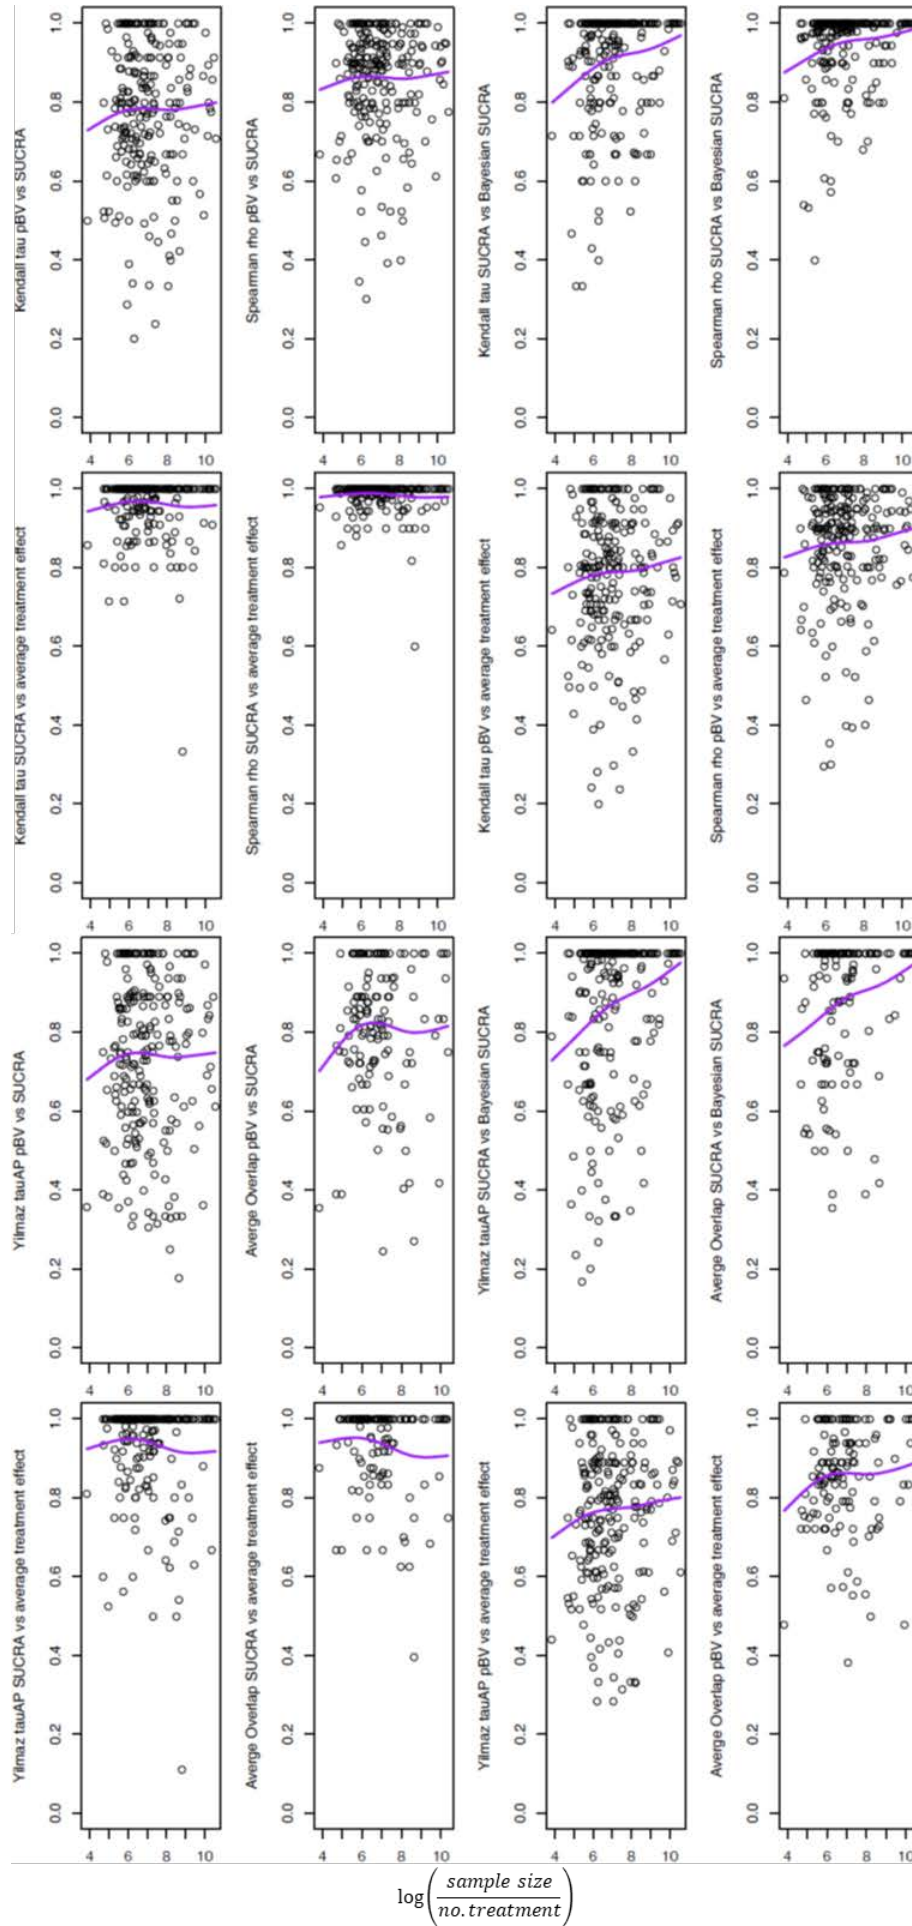

$$\log\left(\frac{\text{sample size}}{\text{no. treatment}}\right)$$

Figure S4: Scatter plots of the total sample size over the number of treatments in a network and the pairwise agreement between hierarchies from different ranking metrics.

**Table S1: Pairwise agreement between treatment hierarchies from illustrative network example.** Medians, 1<sup>st</sup> and 3<sup>rd</sup> quartiles are reported.  $p_{BV}$ : probability of producing the best value;  $SUCRA_F$ : surface under the cumulative ranking curve; relative treatment effect stands for the relative treatment effect against fictional treatment of average performance. The first three column from the left-hand side present the agreements between rankings obtained using the original data; the equivalent three columns on the right-hand side show the agreements between rankings obtained after reducing the standard error of the Conventional versus ARB treatment effect from 0.7 to a fictional value of 0.01.

|                                      | Original data         |                                       |                                        | Fictional data with increased precision for Conventional treatment versus ARB |                                       |                                        |
|--------------------------------------|-----------------------|---------------------------------------|----------------------------------------|-------------------------------------------------------------------------------|---------------------------------------|----------------------------------------|
|                                      | $p_{BV}$ vs $SUCRA_F$ | $p_{BV}$ vs relative treatment effect | $SUCRA_F$ vs relative treatment effect | $p_{BV}$ vs $SUCRA_F$                                                         | $p_{BV}$ vs relative treatment effect | $SUCRA_F$ vs relative treatment effect |
| <b>Spearman <math>\rho</math></b>    | 0.64                  | 0.85                                  | 0.93                                   | 0.89                                                                          | 0.91                                  | 1                                      |
| <b>Kendall <math>\tau</math></b>     | 0.54                  | 0.69                                  | 0.87                                   | 0.78                                                                          | 0.82                                  | 0.99                                   |
| <b>Yilmaz <math>\tau_{AP}</math></b> | 0.39                  | 0.44                                  | 0.87                                   | 0.76                                                                          | 0.81                                  | 0.96                                   |
| <b>Average Overlap</b>               | 0.48                  | 0.54                                  | 0.85                                   | 0.85                                                                          | 0.94                                  | 0.92                                   |

## APPENDIX – YILMAZ'S $\tau_{AP}$ AND AVERAGE OVERLAP

The Yilmaz's  $\tau_{AP}$  calculates the difference between the probability of observing concordance and the probability of observing discordance between two rankings X and Y, penalising more the discordance between top ranks. It can be computed as

$$\tau_{AP}(X, Y) = \frac{2}{N-1} \sum_{i=2}^N \sum_{j<i} \frac{C_{ij}}{i-1} - 1$$

where  $c_{ij}$  is 1 in case the items  $i$  and  $j$  are concordant and 0 otherwise;  $N$  is the total number of items in the ranking.

As Yilmaz's  $\tau_{AP}$  is not symmetric, the authors proposed an alternative measure that takes the average between the two  $\tau_{AP}$ , with the second being the one calculated after swapping the two rankings

$$symm \tau_{AP}(X, Y) = (\tau_{AP}(X|Y) + \tau_{AP}(Y|X))/2$$

As with the original Kendall's  $\tau$ , also the Yilmaz's  $\tau_{AP}$  formula above does not handle ties. Similarly, two formulations to account for this have been proposed<sup>i</sup> and we selected the one that considers correlation as a measure of agreement because more relevant for our purpose. In our chosen version of the Yilmaz's  $\tau_{AP}$ , the  $\tau_{AP,b}$ , neither of the two rankings is considered "true and objective" and ties can be present in either or both of them. The formula appears as follows

$$\tau_{AP,b} = (\tau_{AP,ties}(X|Y) + \tau_{AP,ties}(Y|X))/2 \quad \tau_{AP,ties} = \frac{2}{n-t_1} \sum_{i=t_1+1}^n \sum_{i < p_i} \frac{C_{ij}}{p_i-1} - 1$$

where  $t_1$  is the number of items tied in position  $i=1$  and  $p_i$  is the rank of the first item in  $i$ 's group.

The Average Overlap is a top-weighted measure for top- $k$  rankings that considers the intersection (or overlap) between the two lists,  $|X \cap Y|/k$ . It calculates the cumulative overlap at increasing depths  $d$ ,  $d \in \{1...k\}$  and average it over the depth (cut-off point)  $k$ .

$$AO(X, Y, k) = \frac{1}{k} \sum_{d=1}^k A_d \quad \text{where } A_d = |X \cap Y|/d$$

Unlike the previous measures, the average overlap takes values between 0 and 1.

<sup>i</sup> Julián Urbano and Mónica Marrero, 'The Treatment of Ties in AP Correlation', in *Proceedings of the ACM SIGIR International Conference on Theory of Information Retrieval - ICTIR '17* (the ACM SIGIR International Conference, Amsterdam, The Netherlands: ACM Press, 2017), 321–24, <https://doi.org/10.1145/3121050.3121106>.
