# Supplementary material for: Agreement between ranking metrics in network meta-analysis: an empirical study
Source: PubMed Central journal article supplement (PMC7440831; doi:10.1136/bmjopen-2020-037744), 2020-08-20
Supplement: bmjopen-2020-037744supp001.pdf [file bmjopen-2020-037744supp001.pdf]

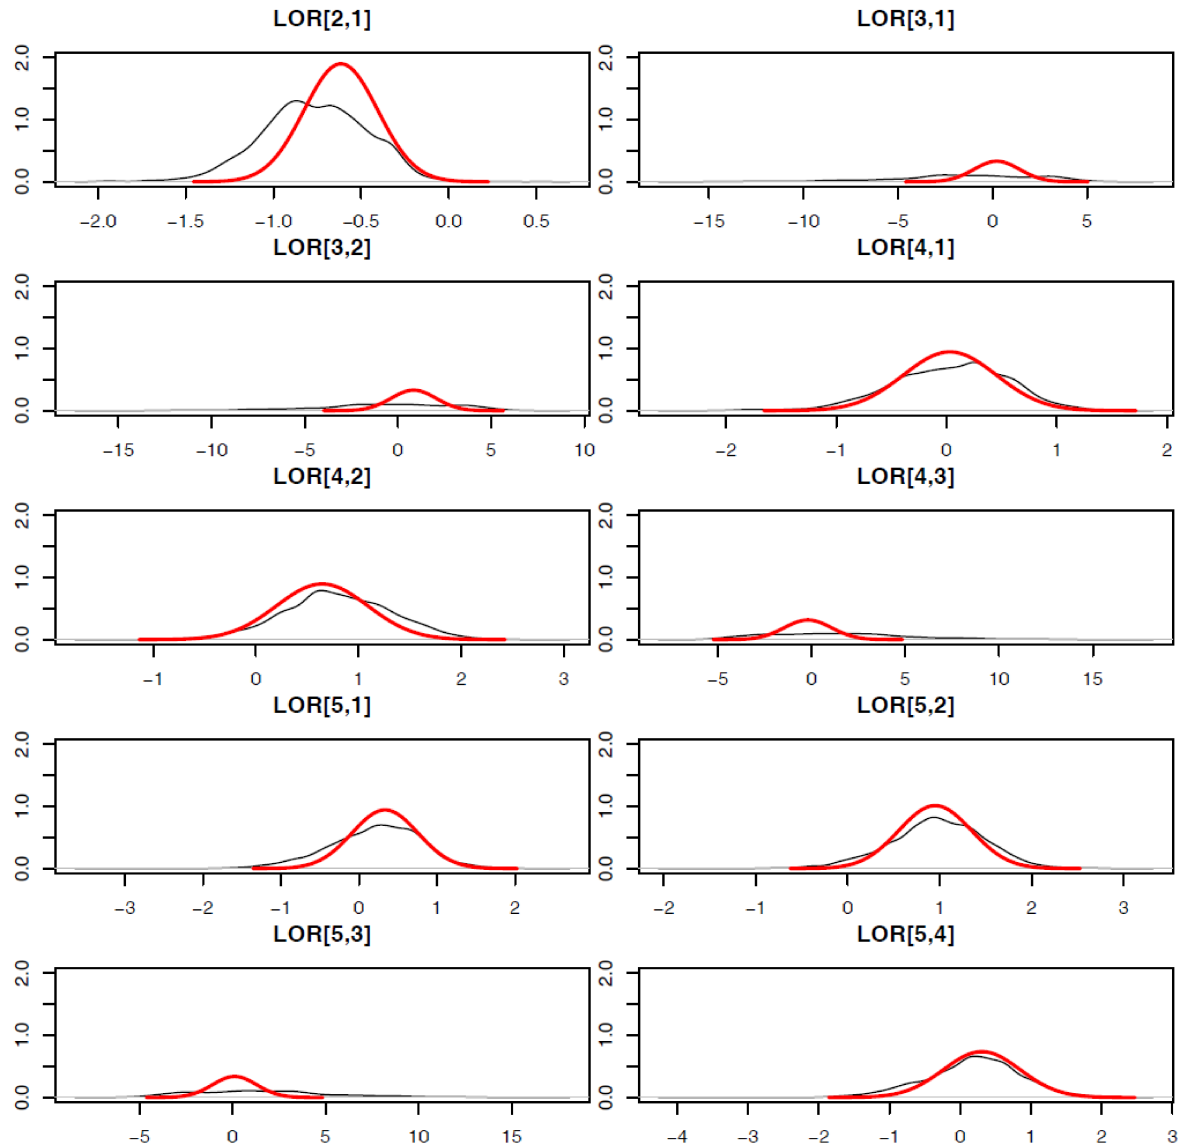

**Figure S1:** Normal distributions of relative treatment effect estimates from frequentist setting (red line) superimposed on posterior distributions of the relative treatment effects from Bayesian model (black line) for a network with Spearman's  $\rho$  of 0.6 between  $SUCRA_F$  and  $SUCRA_B$ . The network meta-analysis used analysed the effects of four inodilators and placebo on survival in adult cardiac surgery patients (Greco et al., *Br J Anaesth* 2015). LOR = log odds ratios; number in square brackets represents the different interventions in the network.

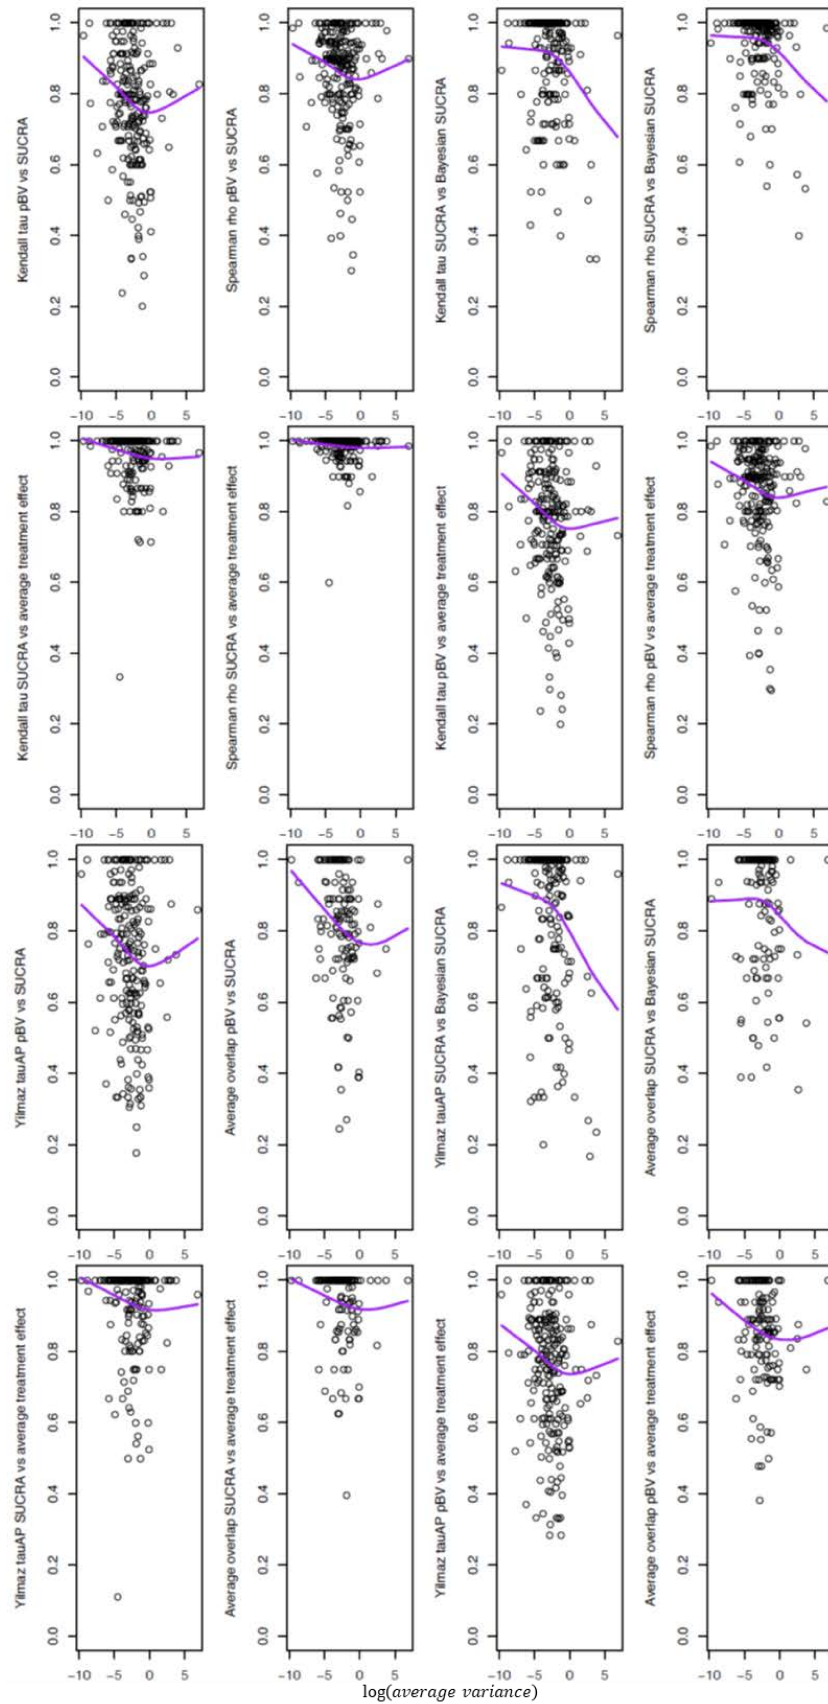

Figure S2: Scatter plots of the average variance in a network and the pairwise agreement between hierarchies from different ranking metrics.

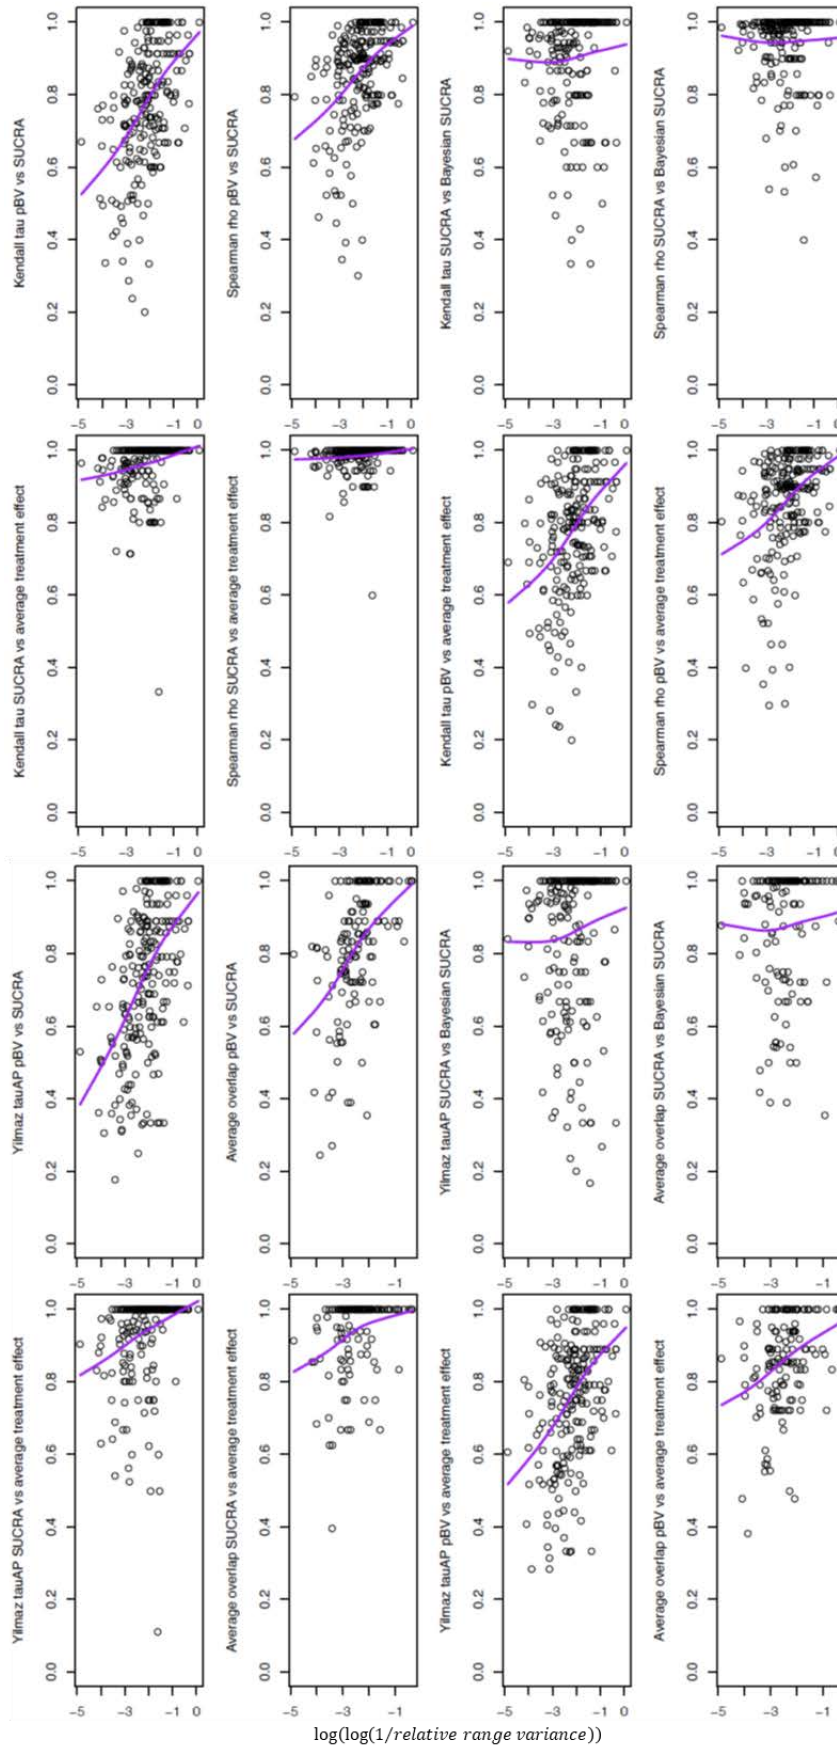

Figure S3: Scatter plots of the relative range of variance in a network and the pairwise agreement between hierarchies from different ranking metrics.

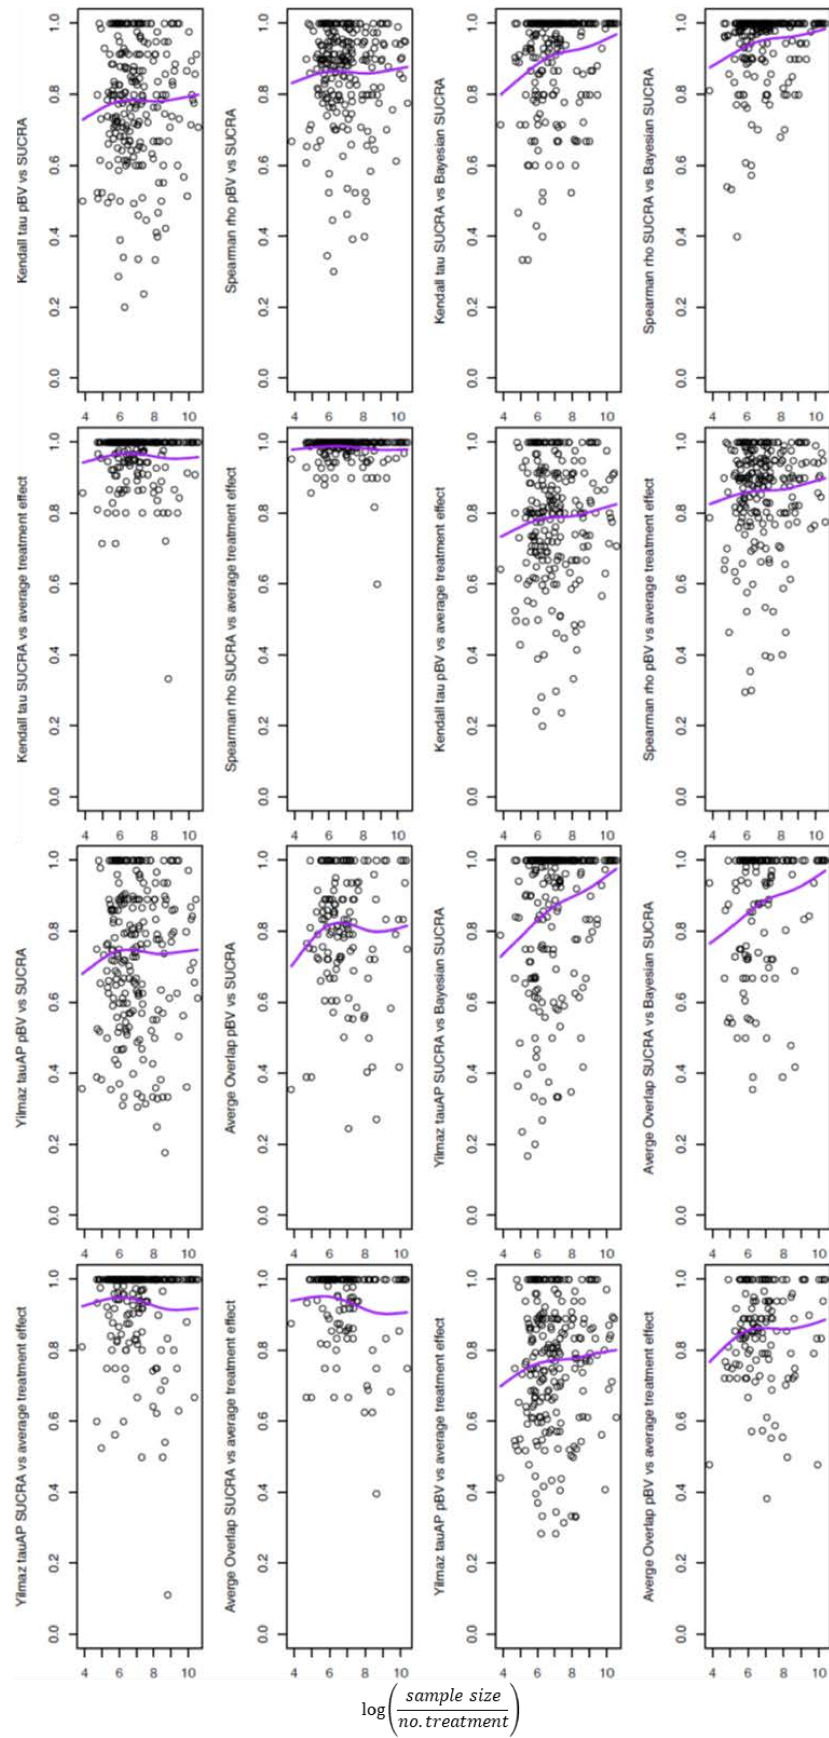

Figure S4: Scatter plots of the total sample size over the number of treatments in a network and the pairwise agreement between hierarchies from different ranking metrics.

**Table S1: Pairwise agreement between treatment hierarchies from illustrative network example.** Medians, 1<sup>st</sup> and 3<sup>rd</sup> quartiles are reported.  $p_{BV}$ : probability of producing the best value;  $SUCRA_F$ : surface under the cumulative ranking curve; relative treatment effect stands for the relative treatment effect against fictional treatment of average performance. The first three column from the left-hand side present the agreements between rankings obtained using the original data; the equivalent three columns on the right-hand side show the agreements between rankings obtained after reducing the standard error of the Conventional versus ARB treatment effect from 0.7 to a fictional value of 0.01.

|                                      | Original data         |                                       |                                        | Fictional data with increased precision for Conventional treatment versus ARB |                                       |                                        |
|--------------------------------------|-----------------------|---------------------------------------|----------------------------------------|-------------------------------------------------------------------------------|---------------------------------------|----------------------------------------|
|                                      | $p_{BV}$ vs $SUCRA_F$ | $p_{BV}$ vs relative treatment effect | $SUCRA_F$ vs relative treatment effect | $p_{BV}$ vs $SUCRA_F$                                                         | $p_{BV}$ vs relative treatment effect | $SUCRA_F$ vs relative treatment effect |
| <b>Spearman <math>\rho</math></b>    | 0.64                  | 0.85                                  | 0.93                                   | 0.89                                                                          | 0.91                                  | 1                                      |
| <b>Kendall <math>\tau</math></b>     | 0.54                  | 0.69                                  | 0.87                                   | 0.78                                                                          | 0.82                                  | 0.99                                   |
| <b>Yilmaz <math>\tau_{AP}</math></b> | 0.39                  | 0.44                                  | 0.87                                   | 0.76                                                                          | 0.81                                  | 0.96                                   |
| <b>Average Overlap</b>               | 0.48                  | 0.54                                  | 0.85                                   | 0.85                                                                          | 0.94                                  | 0.92                                   |

## APPENDIX – YILMAZ'S $\tau_{AP}$ AND AVERAGE OVERLAP

The Yilmaz's  $\tau_{AP}$  calculates the difference between the probability of observing concordance and the probability of observing discordance between two rankings X and Y, penalising more the discordance between top ranks. It can be computed as

$$\tau_{AP}(X, Y) = \frac{2}{N-1} \sum_{i=2}^N \sum_{j<i} \frac{C_{ij}}{i-1} - 1$$

where  $c_{ij}$  is 1 in case the items  $i$  and  $j$  are concordant and 0 otherwise;  $N$  is the total number of items in the ranking.

As Yilmaz's  $\tau_{AP}$  is not symmetric, the authors proposed an alternative measure that takes the average between the two  $\tau_{AP}$ , with the second being the one calculated after swapping the two rankings

$$\text{symm } \tau_{AP}(X, Y) = (\tau_{AP}(X|Y) + \tau_{AP}(Y|X))/2$$

As with the original Kendall's  $\tau$ , also the Yilmaz's  $\tau_{AP}$  formula above does not handle ties. Similarly, two formulations to account for this have been proposed<sup>i</sup> and we selected the one that considers correlation as a measure of agreement because more relevant for our purpose. In our chosen version of the Yilmaz's  $\tau_{AP}$ , the  $\tau_{AP,b}$ , neither of the two rankings is considered "true and objective" and ties can be present in either or both of them. The formula appears as follows

$$\tau_{AP,b} = (\tau_{AP,ties}(X|Y) + \tau_{AP,ties}(Y|X))/2 \quad \tau_{AP,ties} = \frac{2}{n-t_1} \sum_{i=t_1+1}^n \sum_{i < p_i} \frac{C_{ij}}{p_i-1} - 1$$

where  $t_1$  is the number of items tied in position  $i=1$  and  $p_i$  is the rank of the first item in  $i$ 's group.

The Average Overlap is a top-weighted measure for top- $k$  rankings that considers the intersection (or overlap) between the two lists,  $|X \cap Y|/k$ . It calculates the cumulative overlap at increasing depths  $d$ ,  $d \in \{1...k\}$  and average it over the depth (cut-off point)  $k$ .

$$AO(X, Y, k) = \frac{1}{k} \sum_{d=1}^k A_d \quad \text{where } A_d = |X \cap Y|/d$$

Unlike the previous measures, the average overlap takes values between 0 and 1.

<sup>i</sup> Julián Urbano and Mónica Marrero, 'The Treatment of Ties in AP Correlation', in *Proceedings of the ACM SIGIR International Conference on Theory of Information Retrieval - ICTIR '17* (the ACM SIGIR International Conference, Amsterdam, The Netherlands: ACM Press, 2017), 321–24, <https://doi.org/10.1145/3121050.3121106>.
